# Supplementary material
Source: publisher figshare collection journal article supplement (https://gsapubs.figshare.com/articles/dataset/_/16906867)
Supplement: Supplementary file 1 [file 1]

## **GSA Supplemental Information**

### **Morphologic signatures of autogenic waterfalls: A case study in the San Gabriel Mountains, California**

Erika L. Groh\* and Joel S. Scheingross

University of Nevada Reno, Department of Geological Sciences and Engineering, Reno, NV, 89557, USA

\*egroh@nevada.unr.edu

## **SUPPLEMENTAL INFORMATION**

### **Removal of Check Dams and Roads**

The San Gabriel Mountains (SGM) contain check dams and other human-built structures that can be falsely identified as waterfalls using our automated method. We used slopeshade maps created from Lidar DEMs, as well as Google Earth imagery to identify check dams. Check dams had straight crests perpendicular to the channel (Fig. S1a) in contrast to waterfalls which often had arcuate planform shapes (Fig. S1b). Excluding the Santa Anita watershed, our automated method identified 56 straight-crested drops as waterfalls, and we were able to visually confirm the presence of concrete, human made structures for 53 of these cases using Google Earth (Fig. S1c). We removed both the 53 Google Earth confirmed concrete structures from our analyses, as well as the 3 structures we were not able to visually confirm in Google Earth, as the morphology of structures in both of these groups was similar in the Lidar DEMs (Table S1). In the main stem and tributaries to Santa Anita Canyon, there were greater than 40 structures that had a morphologic appearance consistent with a check dam; however, image resolution, image angle, and shading from trees prevented us from confirming these as concrete structures in Google Earth imagery. We removed all tributaries with suspected check dams in Santa Anita Canyon from our analysis, thereby limiting our database to cases where we had high confidence in separating waterfalls and check dams.

### **Cyclic Step Survey in the Ruby Mountains, NV**

To explore cyclic step and autogenic waterfall formation at an intermediate scale between laboratory experiments and river channels, we surveyed cyclic steps eroded into granitic hillslopes near Harrison Pass in the Ruby Mountains, NV (Fig. S2, Table S3). These decimeter-scale steps formed in succession on hillslopes of varying slope and aspect, and had no water flow at the time of the survey. Most of the pool-like structures were partially filled with sand-sized sediment while the step-like structures had exposed bedrock. We used a tape measure to measure step height and pool length as a proxy for the spacing between steps (Fig. S2). To measure the

slope of each group of steps, we laid an inclinometer across the length of steps or, if the slope changed within the group, across sections with the same slope and averaged those values.

### **Influence of Threshold Values on Waterfall Metrics**

We identify waterfalls using three threshold variables: a threshold drainage area set to 1 km<sup>2</sup> to identify the channel head, a threshold waterfall slope set to 30°, and a threshold step height set to 1.5 m. We evaluated the influence of these thresholds on our results by repeating our analyses and individually varying each of the three threshold values. We examined the impact of using a threshold drainage area of 2 km<sup>2</sup> and 0.5 km<sup>2</sup> (Fig. S3), a threshold step height of 1 m and 2 m (Fig. S4), and threshold step slope of 25° and 40° (Fig. S5). In all cases, changes to the threshold values do not result in large changes to our results, and do not change our primary interpretations (Figs. S3-5).

### **Statistical Comparison of Front Range and Big Tujunga Waterfall Morphology**

We performed a two-sample Kolmogorov-Smirnov (K-S) statistical test comparing the distribution of waterfall spacing, waterfall height, and ratio of waterfall height to spacing for the Front Range and Big Tujunga (Fig. S6). The K-S test compares two datasets to test whether the datasets are from the same continuous distribution. The K-S test revealed that there was no statistically significant difference in the distribution of waterfall spacing between the Front Range and Big Tujunga watershed; however, waterfalls in the Big Tujunga tended to be slightly taller than in the Front Range (Fig. S6).

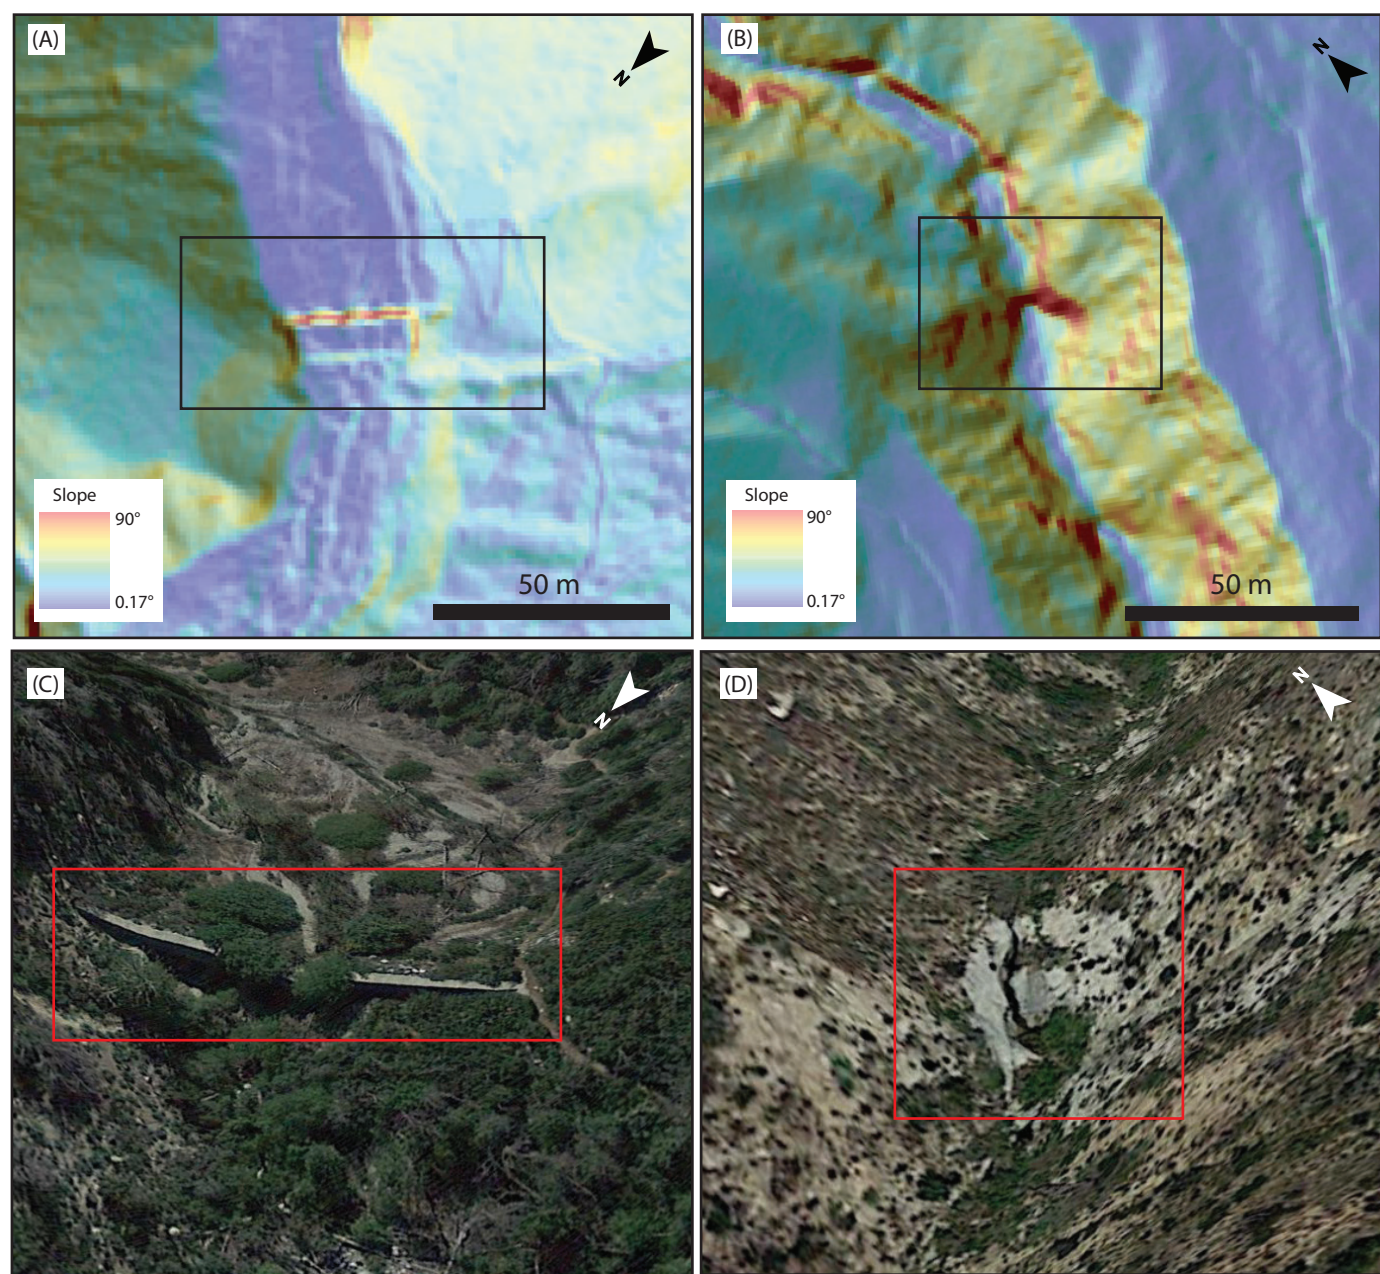

**Figure S1:** Slopeshade showing check dam on Arroyo Secco (A) and waterfall on Ybarra Canyon (B) in 1m<sup>2</sup> resolution Lidar. (C and D) Google Earth imagery showing visual confirmation of check dam and waterfall from panels (A) and (B), respectively. Channel-perpendicular width of check dam in panel (C) is 64 m for scale. Channel-perpendicular width of waterfall in panel (D) is 15 m for scale.



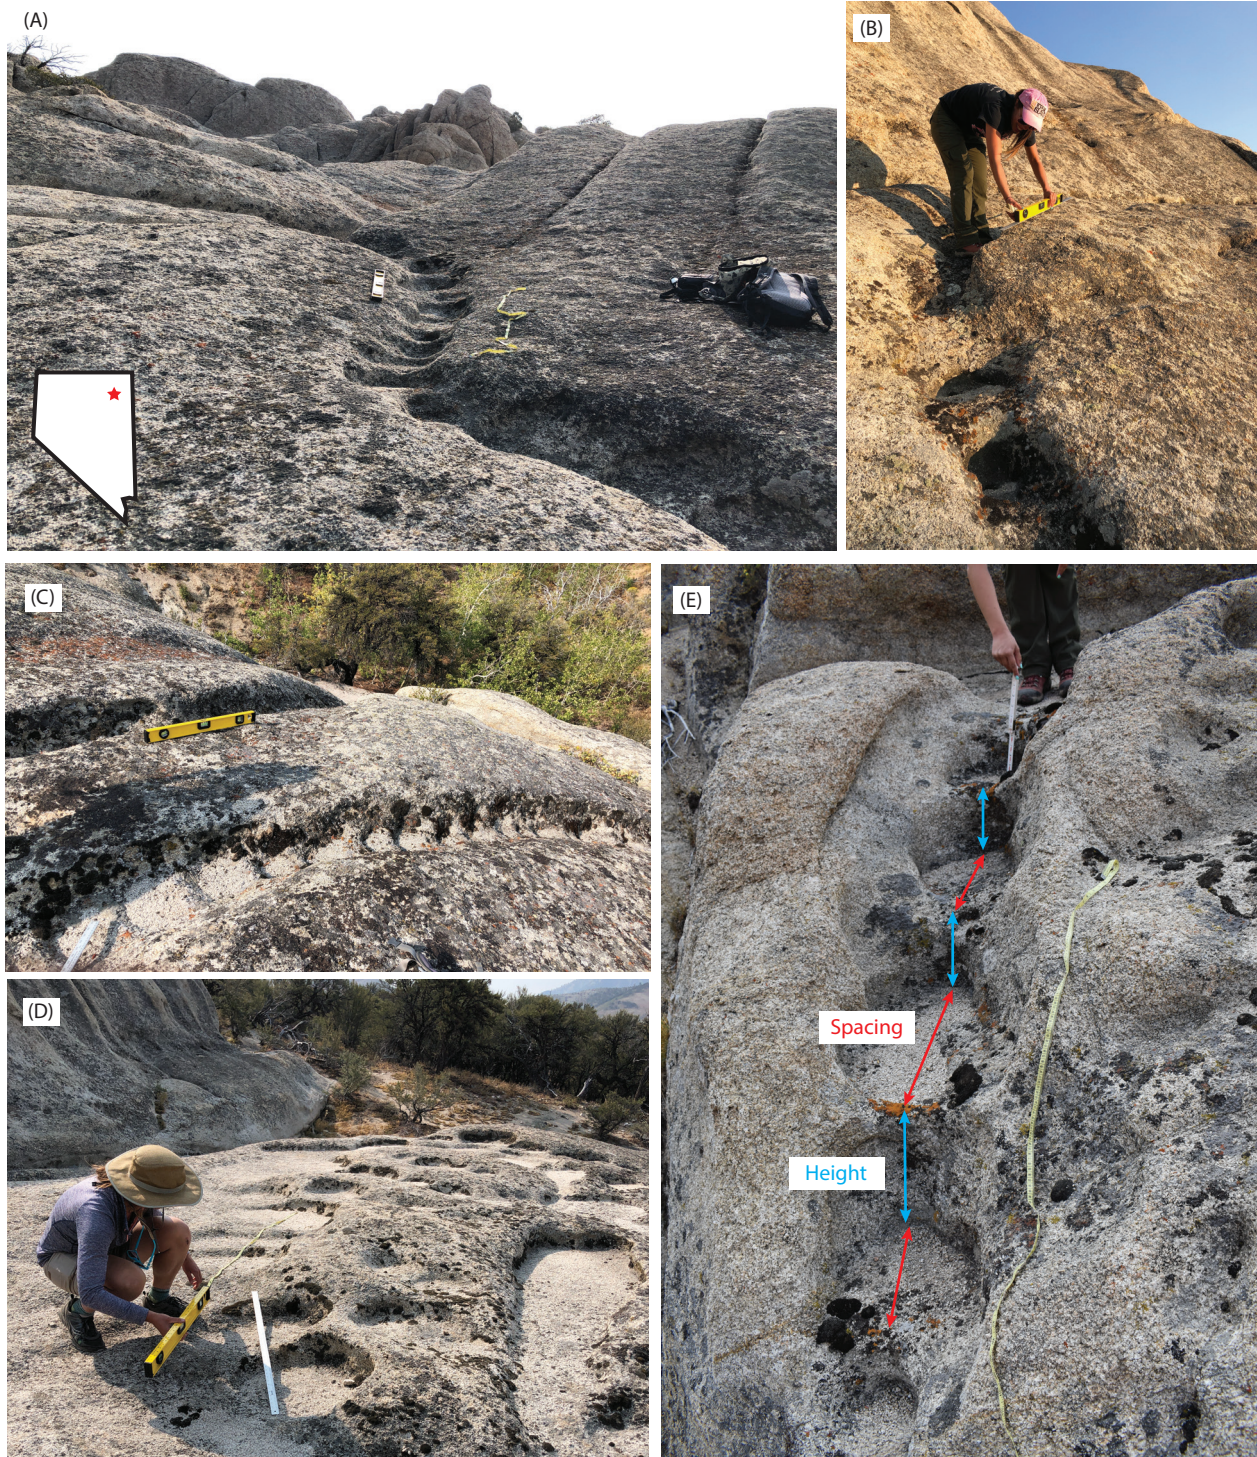

**Figure S2:** (A-D) Example photos showing cyclic steps formed via overland flow on granitic hillslopes in the Ruby Mountains, NV. Insert in panel (A) shows the location of the Ruby Mountains in Eastern Nevada. (E) Annotated photo defining how step height and spacing were measured for the Ruby Mountains cyclic step survey (See Table S3).



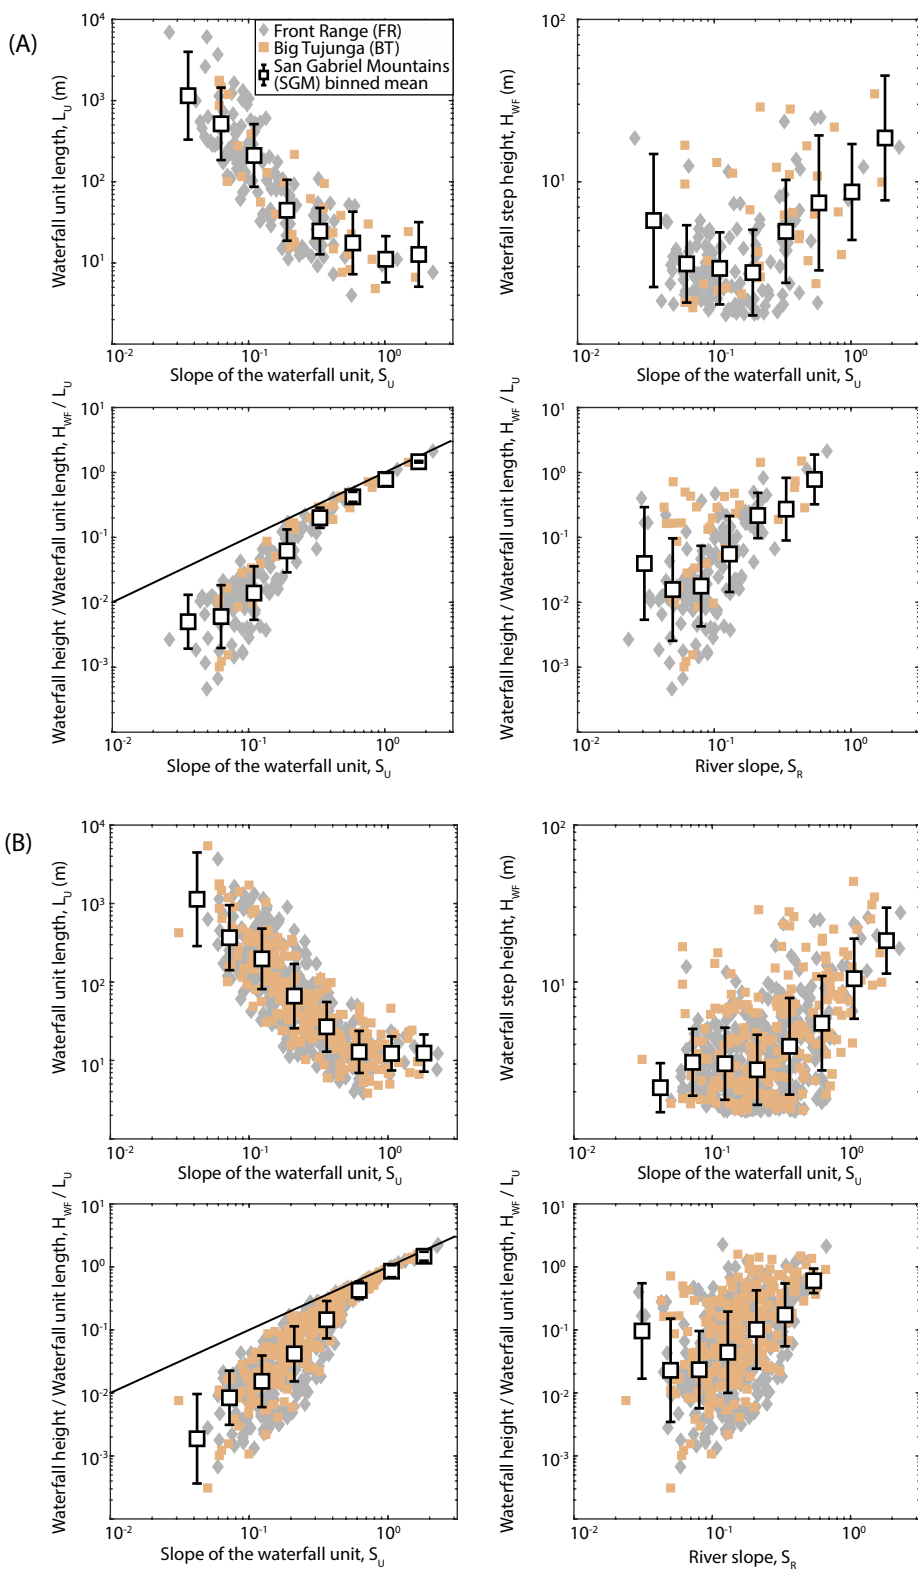

**Figure S3:** Plot of waterfall metrics versus slope varying threshold drainage area from (A) 2 km<sup>2</sup> to (B) 0.5 km<sup>2</sup> while holding threshold step height and slope constant at 1.5 m and 30°, respectively.

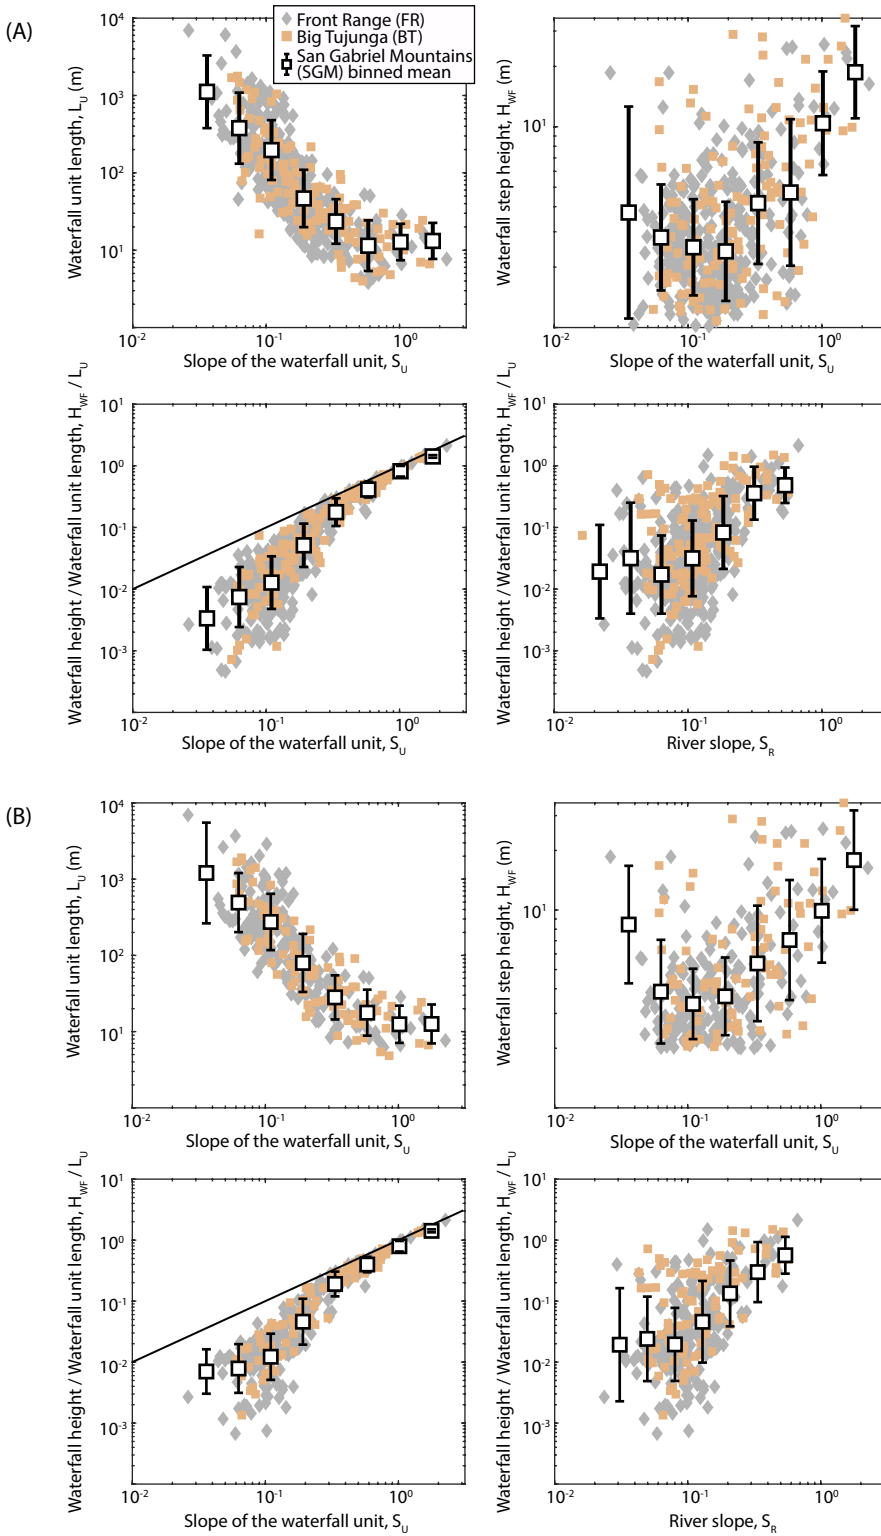

**Figure S4:** Plot of waterfall metrics versus slope varying threshold step height from (A) 1 m to (B) 2 m while holding threshold drainage area and slope constant at  $1 \text{ km}^2$  and  $30^\circ$ , respectively.



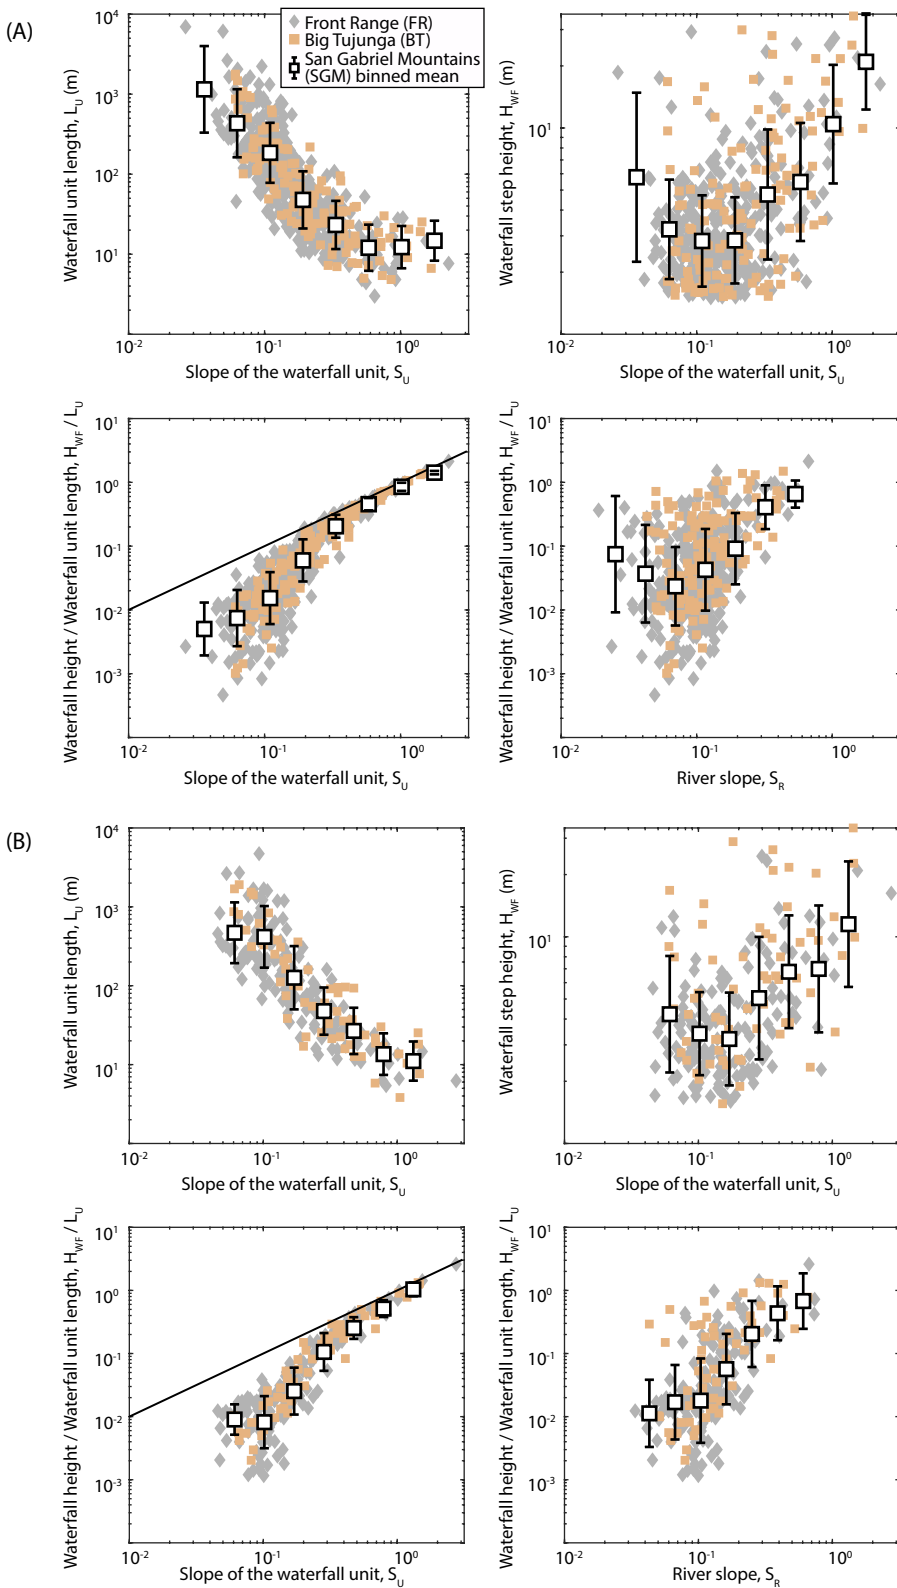

**Figure S5:** Plot of waterfall metrics versus slope varying threshold slope from (A) 25° to (B) 40° while holding threshold step height and drainage area constant at 1.5 m and 1 km<sup>2</sup>, respectively.

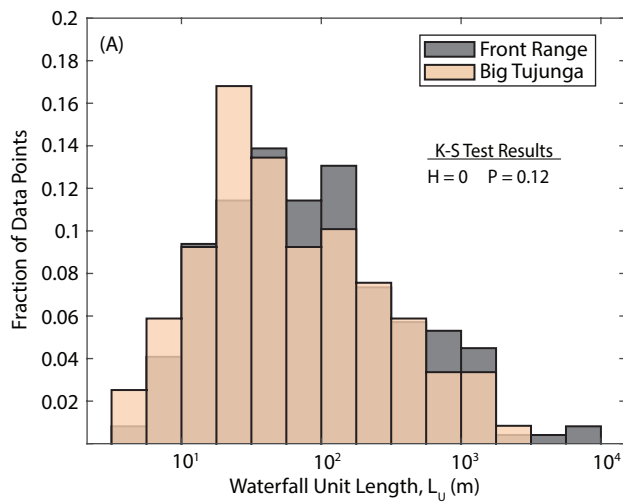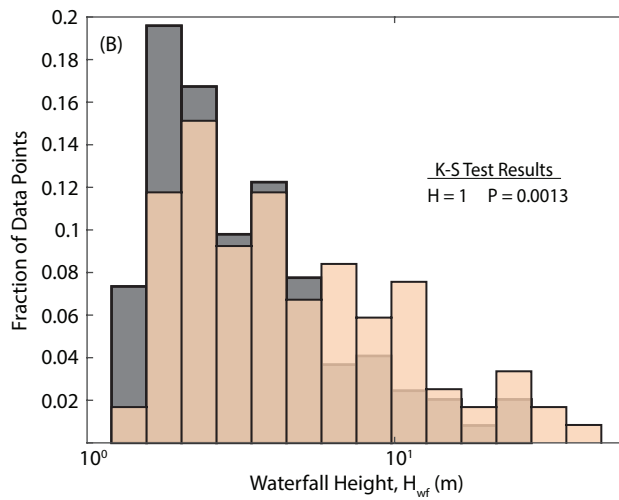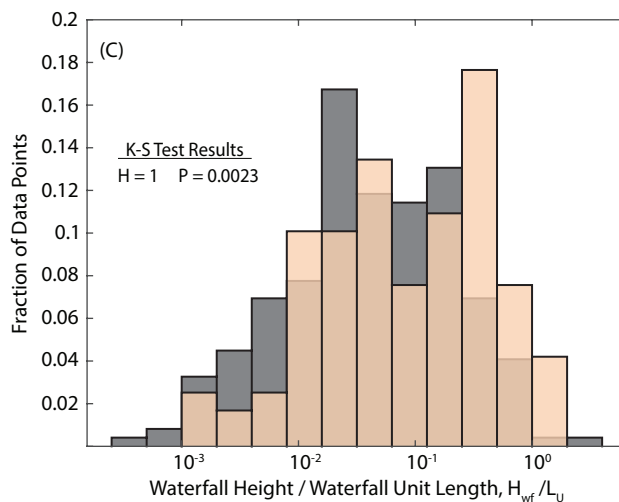

**Figure S6:** Distribution of waterfall morphology observed in the Front Range and Big Tujunga. (A) Waterfall unit length. (B) Waterfall height. (C) Waterfall height / Waterfall unit length. Kolmogorov-Smirnov (K-S) statistical test results reported where  $H = 1$  indicates the distributions are statistically distinct and  $H = 0$  indicates the data are statistically indistinguishable at the  $P < 0.05$  significance level.



TABLE S1. REMOVED CHECK DAMS AND ROADS

| Watershed Name          | Dam ID | UTM East | UTM North |
|-------------------------|--------|----------|-----------|
| Arroyo Secco            | AS D1  | 391182.5 | 3789153.5 |
| Arroyo Secco            | AS D2  | 397158.5 | 3792298.5 |
| Arroyo Secco            | AS D3  | 397213.5 | 3792194.5 |
| Arroyo Secco            | AS D4  | 397199.5 | 3792182.5 |
| Arroyo Secco            | AS D5  | 397125.5 | 3791788.5 |
| Arroyo Secco            | AS D6  | 396806.5 | 3791938.5 |
| Arroyo Secco            | AS D7  | 396783.5 | 3791908.5 |
| Arroyo Secco            | AS D8  | 396631.5 | 3791837.5 |
| Arroyo Secco            | AS D9  | 396488.5 | 3791907.5 |
| Arroyo Secco            | AS D10 | 396282.5 | 3792010.5 |
| Arroyo Secco            | AS D11 | 396055.5 | 3792030.5 |
| Arroyo Secco            | AS D12 | 395849.5 | 3792132.5 |
| Arroyo Secco            | AS D13 | 395486.5 | 3792171.5 |
| Arroyo Secco            | AS D14 | 395286.5 | 3792264.5 |
| Arroyo Secco            | AS D15 | 394892.5 | 3792317.5 |
| Arroyo Secco            | AS D16 | 397547.5 | 3791581.5 |
| Arroyo Secco            | AS D17 | 397419.5 | 3791611.5 |
| Arroyo Secco            | AS D18 | 397226.5 | 3791664.5 |
| Arroyo Secco            | AS D19 | 396959.5 | 3791764.5 |
| Arroyo Secco            | AS D20 | 397091.5 | 3791463.5 |
| Clear Creek             | CL D1  | 392990.5 | 3792900.5 |
| Dunsmore Canyon         | D D1   | 385410.5 | 3791200.5 |
| El Prieto Canyon        | EL D1  | 394009.5 | 3787600.5 |
| El Prieto Canyon        | EL D2  | 393967.5 | 3787463.5 |
| El Prieto Canyon        | EL D3  | 393875.5 | 3787185.5 |
| El Prieto Canyon        | EL D4  | 393765.5 | 3787230.5 |
| El Prieto Canyon        | EL D5  | 393476.5 | 3787153.5 |
| El Prieto Canyon        | EL D6  | 393349.5 | 3787197.5 |
| El Prieto Canyon        | EL D7  | 393236.5 | 3787107.5 |
| El Prieto Canyon        | EL D8  | 393128.5 | 3786967.5 |
| El Prieto Canyon        | EL D9  | 392974.5 | 3786967.5 |
| El Prieto Canyon        | EL D10 | 392862.5 | 3786775.5 |
| El Prieto Canyon        | EL D11 | 392791.5 | 3786674.5 |
| El Prieto Canyon        | EL D12 | 392688.5 | 3786537.5 |
| El Prieto Canyon        | EL D13 | 392530.5 | 3786379.5 |
| Fern Canyon             | FE D1  | 392816.5 | 3788072.5 |
| Fern Canyon             | FE D2  | 392693.5 | 3787993.5 |
| Fern Canyon             | FE D3  | 392118.5 | 3786723.5 |
| Fern Canyon             | FE D4  | 392107.5 | 3786726.5 |
| Fern Canyon             | FE D5  | 392088.5 | 3786625.5 |
| Fern Canyon             | FE D6  | 391955.5 | 3786514.5 |
| Little Santa Anita Wash | LSA D1 | 403896.5 | 3782177.5 |
| Little Santa Anita Wash | LSA D2 | 403827.5 | 3781859.5 |
| Millard Creek           | M D1   | 392930.5 | 3786100.5 |

|                 |       |          |           |
|-----------------|-------|----------|-----------|
| Pasadena Canyon | PA D1 | 400560.5 | 3782668.5 |
| Pasadena Canyon | PA D2 | 400558.5 | 3782656.5 |
| Pasadena Canyon | PA D3 | 400570.5 | 3782589.5 |
| Pasadena Canyon | PA D4 | 400568.5 | 3782373.5 |
| Sutton Canyon   | SU D1 | 387323.5 | 3789680.5 |
| Sutton Canyon   | SU D2 | 387293.5 | 3789513.5 |
| Sutton Canyon   | SU D3 | 387211.5 | 3789321.5 |
| Sutton Canyon   | SU D4 | 387192.5 | 3789292.5 |
| Sutton Canyon   | SU D5 | 387142.5 | 3790518.5 |
| Sutton Canyon   | SU D6 | 387160.5 | 3790435.5 |
| Sutton Canyon   | SU D7 | 387229.5 | 3790131.5 |
| Sutton Canyon   | SU D8 | 387323.5 | 3790011.5 |

---



TABLE S2. CYCLIC STEP EXPERIMENTAL DATA

| Slope*                         | $L_U^{**}$<br>(m) | $H_{wf}^{\#}$<br>(m) | $H_{wf} / L_U$ |
|--------------------------------|-------------------|----------------------|----------------|
| <u>Brooks (2001)</u>           |                   |                      |                |
| 0.16                           | 0.52              | 0.04                 | 0.08           |
| 0.20                           | 0.52              | 0.05                 | 0.09           |
| 0.24                           | 0.26              | 0.04                 | 0.14           |
| 0.29                           | 0.19              | 0.04                 | 0.21           |
| 0.15                           | 0.39              | 0.03                 | 0.07           |
| 0.15                           | 0.40              | 0.06                 | 0.14           |
| 0.16                           | 0.27              | 0.04                 | 0.13           |
| 0.20                           | 0.31              | 0.03                 | 0.11           |
| 0.20                           | 0.27              | 0.05                 | 0.17           |
| 0.25                           | 0.27              | 0.04                 | 0.14           |
| 0.25                           | 0.27              | 0.05                 | 0.18           |
| 0.25                           | 0.32              | 0.05                 | 0.14           |
| 0.29                           | 0.41              | 0.06                 | 0.14           |
| 0.36                           | 0.31              | 0.07                 | 0.23           |
| 0.15                           | 0.28              | 0.03                 | 0.11           |
| 0.20                           | 0.29              | 0.04                 | 0.13           |
| 0.25                           | 0.30              | 0.06                 | 0.19           |
| 0.25                           | 0.37              | 0.06                 | 0.17           |
| 0.30                           | 0.34              | 0.08                 | 0.23           |
| 0.30                           | 0.36              | 0.07                 | 0.20           |
| <u>Ashida and Sawai (1977)</u> |                   |                      |                |
| 0.23                           | 0.09              | 0.01                 | 0.10           |
| 0.23                           | 0.06              | 0.01                 | 0.15           |
| 0.23                           | 0.06              | 0.01                 | 0.21           |
| 0.44                           | 0.04              | 0.00                 | 0.09           |
| 0.44                           | 0.04              | 0.01                 | 0.18           |
| 0.44                           | 0.05              | 0.01                 | 0.20           |
| 0.71                           | 0.04              | 0.01                 | 0.14           |
| 0.71                           | 0.03              | 0.01                 | 0.22           |
| 0.55                           | 0.06              | 0.02                 | 0.34           |
| 0.56                           | 0.15              | 0.06                 | 0.40           |
| 0.20                           | 0.14              | 0.01                 | 0.07           |
| <u>Koyama and Ikeda (1998)</u> |                   |                      |                |
| 0.05                           | 0.83              | 0.00                 | 0.01           |
| 0.11                           | 0.23              | 0.01                 | 0.03           |
| 0.18                           | 0.17              | 0.01                 | 0.07           |
| 0.27                           | 0.14              | 0.03                 | 0.17           |
| 0.36                           | 0.26              | 0.04                 | 0.16           |
| 0.47                           | 0.16              | 0.03                 | 0.20           |
| 0.58                           | 0.23              | 0.07                 | 0.29           |
| 0.70                           | 0.12              | 0.03                 | 0.26           |
| 0.84                           | 0.16              | 0.04                 | 0.24           |

|      |      |      |      |
|------|------|------|------|
| 1.00 | 0.13 | 0.02 | 0.19 |
| 1.19 | 0.12 | 0.06 | 0.47 |
| 1.43 | 0.14 | 0.03 | 0.22 |
| 0.11 | 0.17 | 0.00 | 0.02 |
| 0.36 | 0.11 | 0.01 | 0.05 |
| 0.84 | 0.13 | 0.01 | 0.10 |
| 0.11 | 0.16 | 0.01 | 0.05 |
| 0.36 | 0.14 | 0.02 | 0.11 |
| 0.84 | 0.16 | 0.02 | 0.09 |
| 0.11 | 0.16 | 0.01 | 0.03 |
| 0.36 | 0.15 | 0.02 | 0.11 |
| 0.84 | 0.14 | 0.02 | 0.13 |

Scheingross et al. (2019)

|      |      |      |      |
|------|------|------|------|
| 0.20 | 0.37 | 0.15 | 0.40 |
|------|------|------|------|

Taki and Parker (2005)

|      |      |      |      |
|------|------|------|------|
| 0.04 | 1.30 | 0.03 | 0.02 |
| 0.04 | 0.75 | 0.04 | 0.05 |
| 0.03 | 1.35 | 0.04 | 0.03 |
| 0.04 | 1.07 | 0.04 | 0.04 |
| 0.05 | 0.99 | 0.04 | 0.04 |
| 0.06 | 0.64 | 0.03 | 0.04 |
| 0.05 | 0.63 | 0.03 | 0.05 |
| 0.05 | 0.57 | 0.05 | 0.09 |
| 0.06 | 0.74 | 0.03 | 0.04 |
| 0.05 | 0.95 | 0.02 | 0.03 |
| 0.06 | 0.65 | 0.03 | 0.05 |
| 0.05 | 0.79 | 0.03 | 0.04 |
| 0.04 | 1.02 | 0.02 | 0.02 |
| 0.09 | 1.24 | 0.02 | 0.02 |
| 0.09 | 1.20 | 0.03 | 0.03 |

Yokokawa et al. (2016)

|      |      |      |      |
|------|------|------|------|
| 0.09 | 0.45 | 0.03 | 0.07 |
| 0.09 | 0.58 | 0.02 | 0.03 |
| 0.09 | 0.37 | 0.03 | 0.08 |
| 0.36 | 0.45 | 0.04 | 0.09 |
| 0.09 | 1.25 | 0.02 | 0.02 |
| 0.09 | 0.47 | 0.04 | 0.08 |
| 0.36 | 0.34 | 0.06 | 0.18 |

*Note:* Each line is a separate experimental run with averaged values for that experiment.

\*Slope represents the slope at which the flume was tilted.

\*\* $L_U$  is the waterfall unit length which was measured from hydraulic jump to hydraulic jump then averaged for each experimental run.

<sup>#</sup> $H_{wf}$  is the waterfall height averaged for each experimental run.

TABLE S3. FIELD SURVEY FROM RUBY MOUNTAINS, NV CYCLIC STEP METRICS

| Survey # | Section #* | Average slope of<br>section** | Step # | Pool length <sup>#</sup> | Step height |
|----------|------------|-------------------------------|--------|--------------------------|-------------|
|          |            | (degrees)                     |        | (cm)                     | (cm)        |
| 1        | 1          | 27.1                          | 1      | 22                       | 10          |
| 1        | 1          | 27.1                          | 2      | 13.5                     | 15          |
| 1        | 1          | 27.1                          | 3      | 20.5                     | 11.5        |
| 1        | 1          | 27.1                          | 4      | 20                       | 13.5        |
| 1        | 1          | 27.1                          | 5      | 19.5                     | 19          |
| 1        | 1          | 27.1                          | 6      | 14.5                     | 10          |
| 1        | 1          | 27.1                          | 7      | 15                       | 7           |
| 1        | 1          | 27.1                          | 8      | 11.5                     | 10.5        |
| 1        | 1          | 27.1                          | 9      | 14.5                     | 10          |
| 1        | 2          | 15.7                          | 1      | 16.5                     | 12          |
| 1        | 2          | 15.7                          | 2      | 18.5                     | 7           |
| 1        | 2          | 15.7                          | 3      | 25.5                     | 10.5        |
| 1        | 2          | 15.7                          | 4      | 34                       | 7           |
| 1        | 3          | 6.2                           | 1      | 35                       | 5           |
| 1        | 3          | 6.2                           | 2      | 39                       | 5.5         |
| 1        | 3          | 6.2                           | 3      | 50                       | 4           |
| 1        | 3          | 6.2                           | 4      | 64                       | 2           |
| 2        | 1          | 9.4                           | 1      | 57.5                     | 15.5        |
| 2        | 1          | 9.4                           | 2      | 70                       | 17          |
| 2        | 1          | 9.4                           | 3      | 64                       | 6.5         |
| 2        | 1          | 9.4                           | 4      | 61                       | 12.5        |
| 3        | 1          | 36.0                          | 1      | 25.5                     | 24          |
| 3        | 1          | 36.0                          | 2      | 28                       | 12          |
| 3        | 1          | 36.0                          | 3      | 12                       | 22          |
| 3        | 1          | 36.0                          | 4      | 15                       | 12          |
| 3        | 1          | 36.0                          | 5      | 11                       | 17          |
| 3        | 1          | 36.0                          | 6      | 8                        | 13          |
| 3        | 1          | 36.0                          | 7      | 17                       | 27          |
| 3        | 1          | 36.0                          | 8      | 20                       | 23          |
| 3        | 1          | 36.0                          | 9      | 21                       | 24          |
| 4        | 1          | 19.4                          | 1      | 27                       | 14          |
| 4        | 1          | 19.4                          | 2      | 46                       | 15          |
| 4        | 1          | 19.4                          | 3      | 19.5                     | 12          |
| 4        | 2          | 24.0                          | 1      | 50                       | 42          |
| 4        | 2          | 24.0                          | 2      | 15                       | 16.5        |
| 4        | 2          | 24.0                          | 3      | 13                       | 17          |
| 4        | 3          | 46.5                          | 1      | 21                       | 22.5        |
| 4        | 3          | 46.5                          | 2      | 20                       | 26          |
| 4        | 3          | 46.5                          | 3      | 28                       | 80          |
| 5        | 1          | 15.4                          | 1      | 38                       | 19          |
| 5        | 1          | 15.4                          | 2      | 39                       | 16.5        |
| 5        | 1          | 15.4                          | 3      | 27                       | 8           |

|   |   |      |   |      |      |
|---|---|------|---|------|------|
| 5 | 1 | 15.4 | 4 | 50   | 11   |
| 5 | 1 | 15.4 | 5 | 17.5 | 14   |
| 5 | 2 | 30.0 | 1 | 26   | 17   |
| 5 | 2 | 30.0 | 2 | 22   | 26   |
| 5 | 2 | 30.0 | 3 | 31   | 34   |
| 5 | 2 | 30.0 | 4 | 16.5 | 26.5 |
| 5 | 2 | 30.0 | 5 | 15   | 10   |
| 5 | 3 | 33.0 | 1 | 37   | 34   |
| 5 | 3 | 33.0 | 2 | 48   | 13   |
| 5 | 3 | 33.0 | 3 | 20   | 36   |
| 6 | 1 | 27.2 | 1 | 22   | 12   |
| 6 | 1 | 27.2 | 2 | 26   | 26.5 |
| 6 | 1 | 27.2 | 3 | 51   | 22   |
| 6 | 1 | 27.2 | 4 | 42   | 21   |
| 6 | 1 | 27.2 | 5 | 24   | 16   |
| 7 | 1 | 33.5 | 1 | 14.5 | 9.5  |
| 7 | 1 | 33.5 | 2 | 8    | 12.5 |
| 7 | 1 | 33.5 | 3 | 8.5  | 13   |
| 8 | 1 | 19.2 | 1 | 18   | 7    |
| 8 | 1 | 19.2 | 2 | 21   | 5    |
| 8 | 1 | 19.2 | 3 | 14.5 | 8    |
| 8 | 1 | 19.2 | 4 | 11.5 | 8    |
| 8 | 1 | 19.2 | 5 | 15   | 8.5  |
| 8 | 1 | 19.2 | 6 | 30.5 | 5    |
| 8 | 1 | 19.2 | 7 | 16   | 6.5  |
| 8 | 1 | 19.2 | 8 | 21   | 9    |
| 8 | 1 | 19.2 | 9 | 22   | 10   |
| 8 | 2 | 15.5 | 1 | 27   | 8.5  |
| 8 | 2 | 15.5 | 2 | 24.5 | 4    |
| 8 | 2 | 15.5 | 3 | 8.5  | 9    |
| 8 | 2 | 15.5 | 4 | 12   | 7    |
| 8 | 2 | 15.5 | 5 | 38   | 24   |
| 8 | 2 | 15.5 | 6 | 40   | 14.5 |
| 8 | 2 | 15.5 | 7 | 35   | 15   |
| 8 | 2 | 15.5 | 8 | 29   | 70   |
| 9 | 1 | 16.8 | 1 | 24   | 8.5  |
| 9 | 1 | 16.8 | 2 | 15   | 7    |
| 9 | 1 | 16.8 | 3 | 7.5  | 3.5  |
| 9 | 1 | 16.8 | 4 | 8    | 6.5  |
| 9 | 1 | 16.8 | 5 | 14   | 5    |
| 9 | 1 | 16.8 | 6 | 13.5 | 6    |
| 9 | 1 | 16.8 | 7 | 14   | 5    |
| 9 | 2 | 10.0 | 1 | 15   | 5    |
| 9 | 2 | 10.0 | 2 | 20   | 5    |
| 9 | 2 | 10.0 | 3 | 20   | 2.5  |
| 9 | 2 | 10.0 | 4 | 19.5 | 6.5  |
| 9 | 3 | 26.2 | 1 | 14   | 18   |



|   |   |      |   |      |      |
|---|---|------|---|------|------|
| 9 | 3 | 26.2 | 2 | 40   | 35   |
| 9 | 3 | 26.2 | 3 | 41   | 33   |
| 9 | 3 | 26.2 | 4 | 16.5 | 8.5  |
| 9 | 4 | 23.5 | 1 | 16   | 13   |
| 9 | 4 | 23.5 | 2 | 30   | 4.5  |
| 9 | 4 | 23.5 | 3 | 14   | 14   |
| 9 | 4 | 23.5 | 4 | 23   | 18   |
| 9 | 4 | 23.5 | 5 | 32   | 9    |
| 9 | 5 | 7.4  | 1 | 52   | 8    |
| 9 | 5 | 7.4  | 2 | 33   | 17   |
| 9 | 5 | 7.4  | 3 | 38   | 4.5  |
| 9 | 5 | 7.4  | 4 | 22   | 5    |
| 9 | 5 | 7.4  | 5 | 70   | 10.5 |
| 9 | 6 | 20.7 | 1 | 39   | 17   |
| 9 | 6 | 20.7 | 2 | 24   | 15.5 |
| 9 | 6 | 20.7 | 3 | 27   | 14   |
| 9 | 6 | 20.7 | 4 | 28   | 10.5 |
| 9 | 6 | 20.7 | 5 | 10   | 6    |
| 9 | 6 | 20.7 | 6 | 18   | 11   |

---

*Note:* Location of hillslope for surveys is 40.3030726,-115.5089211

\*Surveys were split into sections where the slope changed within a group of steps.

\*\*Slope was measured across the length of steps and across the hillslope beside the steps then averaged.

#Pool length was used as a proxy for the waterfall unit length and was measured from the base of the upstream step to the lip of the downstream step.

---

TABLE S4. SAN GABRIEL MOUTAINS, CA WATERFALL METRICS

| Watershed Name       | Waterfall ID | UTM East | UTM North | X <sub>L</sub> <sup>*</sup> | X <sub>B</sub> <sup>**</sup> | Z <sub>L</sub> <sup>#</sup> | Z <sub>B</sub> <sup>##</sup> | Drainage<br>Area   | Non-<br>Dimensional<br>Distance <sup>###</sup> | S <sub>R</sub> <sup>*#</sup> | S <sub>U</sub> <sup>**#</sup> | L <sub>U</sub> <sup>+</sup> | H <sub>Wf</sub> <sup>++</sup> |
|----------------------|--------------|----------|-----------|-----------------------------|------------------------------|-----------------------------|------------------------------|--------------------|------------------------------------------------|------------------------------|-------------------------------|-----------------------------|-------------------------------|
|                      |              |          |           | (m)                         | (m)                          | (m)                         | (m)                          | (km <sup>2</sup> ) |                                                |                              |                               | (m)                         | (m)                           |
| Arroyo Secco         | AS1          | 396851.5 | 3789232.5 | 20909.1                     | 20906.6                      | 1217.8                      | 1216.2                       | 1.7                | 1.0                                            | N.D.                         | N.D.                          | N.D.                        | N.D.                          |
| Arroyo Secco         | AS2          | 395543.5 | 3789651.5 | 18682.2                     | 18680.2                      | 1005.6                      | 1003.7                       | 4.4                | 0.8                                            | 0.09                         | 0.10                          | 2226.42                     | 1.86                          |
| Arroyo Secco         | AS3          | 395517.5 | 3789637.5 | 18637.0                     | 18634.6                      | 998.7                       | 997.1                        | 4.4                | 0.8                                            | 0.12                         | 0.14                          | 45.63                       | 1.60                          |
| Arroyo Secco         | AS4          | 392983.5 | 3790219.5 | 12533.9                     | 12530.9                      | 698.2                       | 695.3                        | 24.3               | 0.6                                            | 0.05                         | 0.05                          | 6103.69                     | 2.84                          |
| Arroyo Secco         | AS5          | 391184.5 | 3789151.5 | 5587.0                      | 5580.1                       | 526.8                       | 512.7                        | 36.9               | 0.3                                            | 0.02                         | 0.03                          | 6950.76                     | 14.06                         |
| Arroyo Secco         | AS6          | 397195.5 | 3792182.5 | 23847.0                     | 23835.0                      | 1250.2                      | 1242.2                       | 1.6                | 1.0                                            | N.D.                         | N.D.                          | N.D.                        | N.D.                          |
| Arroyo Secco         | AS7          | 396800.5 | 3791932.5 | 22782.8                     | 22757.4                      | 1175.6                      | 1159.9                       | 1.7                | 0.9                                            | 0.06                         | 0.08                          | 1077.53                     | 15.75                         |
| Arroyo Secco         | AS8          | 395719.5 | 3793147.5 | 21919.5                     | 21917.5                      | 1182.7                      | 1181.1                       | 1.1                | 1.0                                            | N.D.                         | N.D.                          | N.D.                        | N.D.                          |
| Arroyo Secco         | AS9          | 395623.5 | 3793073.5 | 21728.0                     | 21723.6                      | 1163.3                      | 1156.5                       | 1.6                | 1.0                                            | 0.09                         | 0.13                          | 193.95                      | 6.83                          |
| Arroyo Secco         | AS10         | 395630.5 | 3793056.5 | 21707.3                     | 21704.4                      | 1155.2                      | 1153.5                       | 1.6                | 1.0                                            | 0.08                         | 0.15                          | 19.14                       | 1.64                          |
| Arroyo Secco         | AS11         | 395653.5 | 3793029.5 | 21665.2                     | 21662.2                      | 1149.1                      | 1146.7                       | 1.6                | 1.0                                            | 0.11                         | 0.16                          | 42.21                       | 2.35                          |
| Arroyo Secco         | AS12         | 395645.5 | 3793018.5 | 21650.3                     | 21646.5                      | 1143.4                      | 1140.2                       | 1.6                | 1.0                                            | 0.28                         | 0.42                          | 15.73                       | 3.25                          |
| Arroyo Secco         | AS13         | 395557.5 | 3792935.5 | 21492.7                     | 21490.3                      | 1126.0                      | 1123.9                       | 1.6                | 1.0                                            | 0.09                         | 0.10                          | 156.20                      | 2.08                          |
| Arroyo Secco         | AS14         | 395568.5 | 3792956.5 | 21464.9                     | 21462.9                      | 1121.9                      | 1119.1                       | 1.6                | 1.0                                            | 0.08                         | 0.18                          | 27.38                       | 2.82                          |
| Arroyo Secco         | AS15         | 395460.5 | 3792878.5 | 21251.8                     | 21249.4                      | 1100.4                      | 1098.4                       | 1.6                | 1.0                                            | 0.09                         | 0.10                          | 213.55                      | 1.94                          |
| Arroyo Secco         | AS16         | 395466.5 | 3792856.5 | 21224.5                     | 21222.1                      | 1096.4                      | 1094.5                       | 1.6                | 1.0                                            | 0.08                         | 0.15                          | 27.31                       | 1.90                          |
| Arroyo Secco         | AS17         | 395325.5 | 3792758.5 | 20961.7                     | 20959.7                      | 1074.7                      | 1072.8                       | 2.6                | 0.9                                            | 0.08                         | 0.08                          | 262.39                      | 1.85                          |
| Arroyo Secco         | AS18         | 395614.5 | 3791137.5 | 18118.9                     | 18113.9                      | 1129.2                      | 1121.9                       | 1.1                | 1.0                                            | N.D.                         | N.D.                          | N.D.                        | N.D.                          |
| Arroyo Secco         | AS19         | 395606.5 | 3791145.5 | 18105.2                     | 18097.4                      | 1120.0                      | 1111.6                       | 1.1                | 1.0                                            | 0.22                         | 0.62                          | 16.49                       | 8.37                          |
| Arroyo Secco         | AS20         | 395581.5 | 3791143.5 | 18073.2                     | 18069.2                      | 1108.6                      | 1105.0                       | 1.2                | 1.0                                            | 0.13                         | 0.23                          | 28.14                       | 3.53                          |
| Arroyo Secco         | AS21         | 395563.5 | 3791134.5 | 18050.9                     | 18047.5                      | 1102.6                      | 1099.1                       | 1.2                | 1.0                                            | 0.14                         | 0.27                          | 21.73                       | 3.47                          |
| Arroyo Secco         | AS22         | 395519.5 | 3791114.5 | 17995.5                     | 17992.5                      | 1090.3                      | 1088.2                       | 1.2                | 1.0                                            | 0.17                         | 0.20                          | 55.04                       | 2.10                          |
| Arroyo Secco         | AS23         | 395444.5 | 3791124.5 | 17908.9                     | 17905.4                      | 1071.5                      | 1069.0                       | 1.3                | 1.0                                            | 0.20                         | 0.22                          | 87.01                       | 2.54                          |
| Arroyo Secco         | AS24         | 395427.5 | 3791121.5 | 17888.1                     | 17884.1                      | 1067.1                      | 1063.8                       | 1.3                | 1.0                                            | 0.11                         | 0.24                          | 21.31                       | 3.26                          |
| Arroyo Secco         | AS25         | 395391.5 | 3791125.5 | 17840.1                     | 17836.7                      | 1055.5                      | 1053.4                       | 1.4                | 1.0                                            | 0.19                         | 0.22                          | 47.46                       | 2.18                          |
| Arroyo Secco         | AS26         | 395359.5 | 3791146.5 | 17795.9                     | 17792.5                      | 1043.0                      | 1040.1                       | 1.4                | 1.0                                            | 0.25                         | 0.30                          | 44.21                       | 2.83                          |
| Arroyo Secco         | AS27         | 394508.5 | 3790926.5 | 16601.4                     | 16599.4                      | 871.7                       | 869.5                        | 2.2                | 0.9                                            | 0.14                         | 0.14                          | 1193.07                     | 2.16                          |
| Arroyo Secco         | AS28         | 394195.5 | 3790713.5 | 16026.1                     | 16023.7                      | 812.0                       | 809.7                        | 2.5                | 0.9                                            | 0.10                         | 0.10                          | 575.74                      | 2.24                          |
| Arroyo Secco         | AS29         | 394182.5 | 3790709.5 | 16008.6                     | 16006.2                      | 807.6                       | 806.1                        | 2.5                | 0.9                                            | 0.14                         | 0.21                          | 17.49                       | 1.56                          |
| Arroyo Secco         | AS30         | 393895.5 | 3790298.5 | 15386.6                     | 15379.9                      | 822.5                       | 817.8                        | 1.1                | 1.0                                            | N.D.                         | N.D.                          | N.D.                        | N.D.                          |
| Arroyo Secco         | AS31         | 393885.5 | 3790305.5 | 15373.7                     | 15368.9                      | 814.8                       | 811.3                        | 1.1                | 1.0                                            | 0.47                         | 0.58                          | 11.07                       | 3.48                          |
| Arroyo Secco         | AS32         | 393887.5 | 3790315.5 | 15359.8                     | 15340.5                      | 807.5                       | 781.8                        | 1.1                | 1.0                                            | 0.42                         | 1.04                          | 28.38                       | 25.72                         |
| Arroyo Secco         | AS33         | 392176.5 | 3791536.5 | 10823.6                     | 10820.6                      | 746.5                       | 743.3                        | 1.0                | 1.0                                            | N.D.                         | N.D.                          | N.D.                        | N.D.                          |
| Arroyo Secco         | AS34         | 392171.5 | 3791534.5 | 10817.7                     | 10814.3                      | 742.1                       | 738.5                        | 1.0                | 1.0                                            | 0.42                         | 0.78                          | 6.24                        | 3.65                          |
| Arroyo Secco         | AS35         | 392159.5 | 3791511.5 | 10787.8                     | 10782.5                      | 735.1                       | 727.6                        | 1.2                | 1.0                                            | 0.13                         | 0.34                          | 31.80                       | 7.45                          |
| Arroyo Secco         | AS36         | 391993.5 | 3791125.5 | 10250.7                     | 10247.3                      | 678.3                       | 675.8                        | 1.4                | 0.9                                            | 0.09                         | 0.10                          | 535.22                      | 2.50                          |
| Arroyo Secco         | AS37         | 391666.5 | 3790710.5 | 9446.2                      | 9436.6                       | 609.2                       | 598.8                        | 3.9                | 0.9                                            | 0.08                         | 0.10                          | 810.75                      | 10.44                         |
| Arroyo Secco         | AS38         | 390671.5 | 3791113.5 | 10315.5                     | 10312.5                      | 740.8                       | 738.4                        | 1.4                | 1.0                                            | N.D.                         | N.D.                          | N.D.                        | N.D.                          |
| Arroyo Secco         | AS39         | 390693.5 | 3791093.5 | 10226.5                     | 10224.5                      | 727.1                       | 724.9                        | 1.4                | 1.0                                            | 0.13                         | 0.15                          | 87.91                       | 2.16                          |
| Arroyo Secco         | AS40         | 390719.5 | 3791077.5 | 10172.6                     | 10169.2                      | 721.7                       | 717.4                        | 1.4                | 1.0                                            | 0.06                         | 0.14                          | 55.36                       | 4.33                          |
| Arroyo Secco         | AS41         | 390878.5 | 3790959.5 | 9847.4                      | 9843.9                       | 690.5                       | 687.6                        | 1.6                | 1.0                                            | 0.08                         | 0.09                          | 325.25                      | 2.86                          |
| Arroyo Secco         | AS42         | 391278.5 | 3790643.5 | 9057.4                      | 9055.0                       | 636.1                       | 634.4                        | 1.8                | 0.9                                            | 0.07                         | 0.07                          | 788.92                      | 1.69                          |
| Arroyo Secco         | AS43         | 391413.5 | 3790537.5 | 8815.3                      | 8812.8                       | 617.9                       | 615.9                        | 1.9                | 0.9                                            | 0.07                         | 0.08                          | 242.18                      | 2.05                          |
| Arroyo Secco         | AS44         | 391435.5 | 3790540.5 | 8783.0                      | 8780.6                       | 611.8                       | 610.1                        | 1.9                | 0.8                                            | 0.14                         | 0.18                          | 32.21                       | 1.67                          |
| Arroyo Secco         | AS45         | 391481.5 | 3790522.5 | 8715.9                      | 8713.9                       | 606.1                       | 603.5                        | 1.9                | 0.8                                            | 0.06                         | 0.10                          | 66.70                       | 2.61                          |
| Arroyo Secco         | AS46         | 391476.5 | 3790477.5 | 8662.5                      | 8658.6                       | 599.5                       | 591.1                        | 1.9                | 0.8                                            | 0.08                         | 0.22                          | 55.28                       | 8.43                          |
| Arroyo Secco         | AS47         | 391466.5 | 3790464.5 | 8636.7                      | 8634.7                       | 588.4                       | 586.8                        | 1.9                | 0.8                                            | 0.12                         | 0.18                          | 23.90                       | 1.61                          |
| Arroyo Secco         | AS48         | 391480.5 | 3790449.5 | 8612.4                      | 8608.4                       | 584.5                       | 580.6                        | 1.9                | 0.8                                            | 0.11                         | 0.24                          | 26.31                       | 3.89                          |
| Arroyo Secco         | AS49         | 391834.5 | 3790860.5 | 9781.1                      | 9778.1                       | 675.5                       | 672.9                        | 1.1                | 1.0                                            | N.D.                         | N.D.                          | N.D.                        | N.D.                          |
| Arroyo Secco         | AS50         | 391834.5 | 3790853.5 | 9773.3                      | 9763.4                       | 672.2                       | 650.3                        | 1.1                | 1.0                                            | 0.14                         | 1.54                          | 14.66                       | 21.89                         |
| Arroyo Secco         | AS51         | 391832.5 | 3790831.5 | 9748.8                      | 9741.4                       | 649.1                       | 639.4                        | 1.1                | 1.0                                            | 0.08                         | 0.50                          | 22.07                       | 9.73                          |
| Arroyo Secco         | AS52         | 391831.5 | 3790797.5 | 9711.1                      | 9701.6                       | 636.8                       | 629.3                        | 1.1                | 0.9                                            | 0.08                         | 0.26                          | 39.73                       | 7.59                          |
| Arroyo Secco         | AS53         | 391853.5 | 3788973.5 | 5361.0                      | 5355.2                       | 548.8                       | 543.4                        | 1.3                | 0.9                                            | N.D.                         | N.D.                          | N.D.                        | N.D.                          |
| Arroyo Secco         | AS54         | 391702.5 | 3788938.5 | 5140.8                      | 5137.4                       | 526.6                       | 522.9                        | 1.5                | 0.9                                            | 0.08                         | 0.09                          | 217.79                      | 3.69                          |
| Bailey Canyon        | BA1          | 402243.5 | 3782679.5 | 1120.8                      | 1118.4                       | 513.6                       | 511.5                        | 1.0                | 1.0                                            | N.D.                         | N.D.                          | N.D.                        | N.D.                          |
| Bailey Canyon        | BA2          | 402242.5 | 3782675.5 | 1115.6                      | 1106.9                       | 510.4                       | 499.1                        | 1.0                | 1.0                                            | 0.38                         | 1.08                          | 11.49                       | 11.29                         |
| Bailey Canyon        | BA3          | 402232.5 | 3782667.5 | 1099.7                      | 1095.2                       | 498.5                       | 493.5                        | 1.0                | 1.0                                            | 0.08                         | 0.48                          | 11.66                       | 5.06                          |
| Bailey Canyon        | BA4          | 402196.5 | 3782642.5 | 1051.5                      | 1047.7                       | 486.7                       | 481.6                        | 1.1                | 0.9                                            | 0.16                         | 0.25                          | 47.53                       | 5.08                          |
| Bailey Canyon        | BA5          | 402203.5 | 3782585.5 | 978.3                       | 974.9                        | 469.2                       | 465.6                        | 1.1                | 0.9                                            | 0.18                         | 0.22                          | 72.84                       | 3.61                          |
| Bailey Canyon        | BA6          | 402208.5 | 3782561.5 | 950.6                       | 947.7                        | 462.6                       | 460.7                        | 1.1                | 0.8                                            | 0.12                         | 0.18                          | 27.14                       | 1.96                          |
| Bailey Canyon        | BA7          | 402156.5 | 3782482.5 | 835.3                       | 831.9                        | 450.9                       | 444.6                        | 1.1                | 0.7                                            | 0.09                         | 0.14                          | 115.81                      | 6.29                          |
| Bailey Canyon        | BA8          | 402129.5 | 3782451.5 | 790.2                       | 785.4                        | 440.2                       | 431.1                        | 1.1                | 0.7                                            | 0.11                         | 0.29                          | 46.53                       | 9.07                          |
| Bryant Canyon        | BR1          | 383047.5 | 3794910.5 | 1644.9                      | 1641.1                       | 694.8                       | 692.5                        | 1.3                | 0.7                                            | N.D.                         | N.D.                          | N.D.                        | N.D.                          |
| Bryant Canyon        | BR2          | 383038.5 | 3794914.5 | 1634.3                      | 1632.3                       | 691.9                       | 689.4                        | 1.3                | 0.7                                            | 0.09                         | 0.35                          | 8.83                        | 2.46                          |
| Bryant Canyon        | BR3          | 383008.5 | 3794909.5 | 1601.4                      | 1598.0                       | 686.1                       | 682.6                        | 1.3                | 0.7                                            | 0.11                         | 0.20                          | 34.31                       | 3.42                          |
| Clear Creek          | CL1          | 392990.5 | 3792943.5 | 5171.1                      | 5165.9                       | 1020.6                      | 1015.9                       | 1.3                | 1.0                                            | N.D.                         | N.D.                          | N.D.                        | N.D.                          |
| Clear Creek          | CL2          | 392722.5 | 3792876.5 | 4840.8                      | 4838.4                       | 985.3                       | 983.2                        | 1.4                | 0.9                                            | 0.09                         | 0.10                          | 327.49                      | 2.05                          |
| Clear Creek          | CL3          | 392655.5 | 3792951.5 | 4696.9                      | 4693.9                       | 970.0                       | 967.7                        | 1.9                | 0.9                                            | 0.09                         | 0.11                          | 144.47                      | 2.35                          |
| Clear Creek          | CL4          | 392500.5 | 3793188.5 | 4224.3                      | 4220.3                       | 930.6                       | 925.5                        | 2.8                | 0.8                                            | 0.08                         | 0.09                          | 473.62                      | 5.04                          |
| Clear Creek          | CL5          | 391482.5 | 3793448.5 | 2807.6                      | 2804.2                       | 810.5                       | 806.2                        | 4.9                | 0.5                                            | 0.08                         | 0.08                          | 1416.14                     | 4.21                          |
| Clear Creek          | CL6          | 390642.5 | 3793865.5 | 1338.0                      | 1335.6                       | 715.2                       | 713.4                        | 7.0                | 0.2                                            | 0.06                         | 0.06                          | 1468.55                     | 1.81                          |
| Clear Creek          | CL7          | 390428.5 | 3793857.5 | 1061.7                      | 1058.7                       | 692.6                       | 690.2                        | 7.1                | 0.2                                            | 0.08                         | 0.08                          | 276.94                      | 2.35                          |
| Coldwater Canyon     | COL1         | 397308.5 | 3796873.5 | 265.1                       | 263.1                        | 974.3                       | 972.4                        | 1.9                | 0.1                                            | N.D.                         | N.D.                          | N.D.                        | N.D.                          |
| Cooks Canyon Channel | CO1          | 384482.5 | 3790895.5 | 561.1                       | 558.6                        | 753.0                       | 748.8                        | 1.2                | 0.5                                            | N.D.                         | N.D.                          | N.D.                        | N.D.                          |

|                      |      |          |           |         |         |        |        |      |     |      |      |         |       |
|----------------------|------|----------|-----------|---------|---------|--------|--------|------|-----|------|------|---------|-------|
| Cooks Canyon Channel | CO2  | 384383.5 | 3790873.5 | 428.5   | 425.1   | 735.1  | 731.0  | 1.3  | 0.4 | 0.10 | 0.13 | 133.54  | 4.15  |
| Cooks Canyon Channel | CO3  | 384296.5 | 3790903.5 | 293.1   | 290.1   | 721.1  | 717.6  | 1.3  | 0.2 | 0.07 | 0.10 | 134.95  | 3.50  |
| Cooks Canyon Channel | CO4  | 384136.5 | 3790814.5 | 66.9    | 63.9    | 703.2  | 700.4  | 1.4  | 0.1 | 0.06 | 0.08 | 226.28  | 2.80  |
| Eaton Wash           | EA1  | 399508.5 | 3787976.5 | 10486.2 | 10483.8 | 1116.2 | 1114.2 | 1.3  | 0.9 | N.D. | N.D. | N.D.    | N.D.  |
| Eaton Wash           | EA2  | 399507.5 | 3787929.5 | 10430.5 | 10425.2 | 1105.7 | 1100.8 | 1.6  | 0.9 | 0.16 | 0.23 | 58.53   | 4.83  |
| Eaton Wash           | EA3  | 399595.5 | 3787739.5 | 10181.7 | 10179.7 | 1071.0 | 1069.3 | 1.8  | 0.9 | 0.12 | 0.13 | 245.59  | 1.72  |
| Eaton Wash           | EA4  | 400050.5 | 3786843.5 | 8863.6  | 8861.6  | 927.6  | 925.8  | 2.5  | 0.8 | 0.11 | 0.11 | 1318.02 | 1.75  |
| Eaton Wash           | EA5  | 400101.5 | 3785894.5 | 7543.3  | 7540.9  | 808.0  | 805.8  | 7.4  | 0.7 | 0.09 | 0.09 | 1320.71 | 2.16  |
| Eaton Wash           | EA6  | 399632.5 | 3785291.5 | 6112.8  | 6109.4  | 705.0  | 702.3  | 12.5 | 0.6 | 0.07 | 0.07 | 1431.52 | 2.72  |
| Eaton Wash           | EA7  | 399543.5 | 3785314.5 | 6002.6  | 5999.8  | 696.2  | 694.2  | 12.6 | 0.5 | 0.06 | 0.07 | 109.64  | 1.98  |
| Eaton Wash           | EA8  | 399539.5 | 3785312.5 | 5997.8  | 5995.8  | 693.7  | 691.9  | 12.6 | 0.5 | 0.24 | 0.57 | 4.00    | 1.80  |
| Eaton Wash           | EA9  | 399440.5 | 3785354.5 | 5829.3  | 5826.9  | 680.5  | 678.0  | 12.6 | 0.5 | 0.07 | 0.08 | 168.85  | 2.53  |
| Eaton Wash           | EA10 | 399406.5 | 3785421.5 | 5715.6  | 5708.8  | 668.9  | 661.6  | 12.7 | 0.5 | 0.08 | 0.14 | 118.12  | 7.32  |
| Eaton Wash           | EA11 | 399381.5 | 3785414.5 | 5667.3  | 5664.9  | 657.4  | 655.2  | 12.7 | 0.5 | 0.10 | 0.15 | 43.87   | 2.20  |
| Eaton Wash           | EA12 | 399371.5 | 3785394.5 | 5640.4  | 5632.1  | 653.2  | 641.2  | 12.7 | 0.5 | 0.08 | 0.43 | 32.80   | 11.96 |
| Eaton Wash           | EA13 | 399346.5 | 3785377.5 | 5605.4  | 5603.4  | 638.7  | 637.0  | 12.7 | 0.5 | 0.09 | 0.15 | 28.73   | 1.72  |
| Eaton Wash           | EA14 | 399069.5 | 3784744.5 | 4468.2  | 4465.2  | 569.8  | 567.8  | 14.9 | 0.4 | 0.06 | 0.06 | 1138.18 | 2.02  |
| Eaton Wash           | EA15 | 399006.5 | 3784874.5 | 4270.4  | 4268.4  | 553.9  | 551.3  | 14.9 | 0.4 | 0.07 | 0.08 | 196.79  | 2.57  |
| Eaton Wash           | EA16 | 398969.5 | 3784927.5 | 4192.3  | 4189.9  | 546.2  | 544.0  | 14.9 | 0.4 | 0.07 | 0.09 | 78.50   | 2.21  |
| Eaton Wash           | EA17 | 398747.5 | 3784823.5 | 3739.6  | 3737.6  | 518.3  | 516.2  | 15.1 | 0.3 | 0.06 | 0.06 | 452.35  | 2.12  |
| Eaton Wash           | EA18 | 398441.5 | 3784832.5 | 3110.9  | 3108.5  | 486.2  | 484.5  | 15.8 | 0.3 | 0.05 | 0.05 | 629.07  | 1.76  |
| Eaton Wash           | EA19 | 398369.5 | 3784756.5 | 2940.2  | 2933.2  | 473.9  | 462.3  | 15.9 | 0.3 | 0.06 | 0.13 | 175.30  | 11.57 |
| Eaton Wash           | EA20 | 398425.5 | 3784496.5 | 2202.6  | 2196.2  | 426.9  | 414.4  | 16.2 | 0.2 | 0.05 | 0.07 | 737.01  | 12.52 |
| Eaton Wash           | EA21 | 399058.5 | 3786927.5 | 9959.8  | 9956.8  | 1084.1 | 1082.1 | 2.0  | 0.9 | N.D. | N.D. | N.D.    | N.D.  |
| Eaton Wash           | EA22 | 399442.5 | 3786558.5 | 8960.2  | 8958.2  | 994.2  | 992.2  | 2.5  | 0.9 | 0.09 | 0.09 | 998.63  | 1.95  |
| Eaton Wash           | EA23 | 399831.5 | 3786130.5 | 7935.2  | 7931.2  | 903.3  | 899.3  | 2.8  | 0.8 | 0.09 | 0.09 | 1026.95 | 3.92  |
| Eaton Wash           | EA24 | 399779.5 | 3785979.5 | 7700.2  | 7695.8  | 882.2  | 877.5  | 2.9  | 0.7 | 0.07 | 0.09 | 235.42  | 4.76  |
| Eaton Wash           | EA25 | 399787.5 | 3785974.5 | 7689.0  | 7686.5  | 876.3  | 874.5  | 2.9  | 0.7 | 0.18 | 0.32 | 9.24    | 1.75  |
| Eaton Wash           | EA26 | 399861.5 | 3785909.5 | 7561.0  | 7559.0  | 857.2  | 854.8  | 2.9  | 0.7 | 0.14 | 0.15 | 127.54  | 2.37  |
| Eaton Wash           | EA27 | 399886.5 | 3785903.5 | 7527.0  | 7524.6  | 851.4  | 849.8  | 2.9  | 0.7 | 0.11 | 0.15 | 34.38   | 1.56  |
| Eaton Wash           | EA28 | 399910.5 | 3785908.5 | 7497.1  | 7494.1  | 847.0  | 844.1  | 2.9  | 0.7 | 0.10 | 0.19 | 30.56   | 2.92  |
| Eaton Wash           | EA29 | 399951.5 | 3785898.5 | 7447.4  | 7439.8  | 836.2  | 822.5  | 3.0  | 0.7 | 0.17 | 0.40 | 54.28   | 13.71 |
| Eaton Wash           | EA30 | 399981.5 | 3785879.5 | 7408.4  | 7403.6  | 815.8  | 809.6  | 3.0  | 0.7 | 0.21 | 0.36 | 36.21   | 6.22  |
| Eaton Wash           | EA31 | 399991.5 | 3785867.5 | 7391.7  | 7387.8  | 808.2  | 804.4  | 3.0  | 0.7 | 0.11 | 0.33 | 15.73   | 3.80  |
| Eaton Wash           | EA32 | 400001.5 | 3785851.5 | 7368.1  | 7366.1  | 802.0  | 800.3  | 3.0  | 0.7 | 0.12 | 0.19 | 21.73   | 1.71  |
| Eaton Wash           | EA33 | 400007.5 | 3785841.5 | 7355.6  | 7353.6  | 799.1  | 797.4  | 3.0  | 0.7 | 0.12 | 0.24 | 12.49   | 1.73  |
| Eaton Wash           | EA34 | 400012.5 | 3785833.5 | 7344.4  | 7342.4  | 797.1  | 795.2  | 3.0  | 0.7 | 0.03 | 0.20 | 11.24   | 1.89  |
| Eaton Wash           | EA35 | 400050.5 | 3786209.5 | 9148.1  | 9145.1  | 1009.5 | 1007.4 | 1.6  | 0.9 | N.D. | N.D. | N.D.    | N.D.  |
| Eaton Wash           | EA36 | 400866.5 | 3786188.5 | 9116.1  | 9113.7  | 1002.7 | 1000.9 | 1.6  | 0.9 | 0.16 | 0.21 | 31.38   | 1.83  |
| Eaton Wash           | EA37 | 400761.5 | 3786165.5 | 8798.5  | 8795.5  | 965.0  | 962.4  | 1.7  | 0.9 | 0.11 | 0.12 | 318.19  | 2.64  |
| Eaton Wash           | EA38 | 400562.5 | 3786202.5 | 8462.2  | 8457.2  | 929.6  | 924.4  | 1.7  | 0.9 | 0.10 | 0.11 | 338.29  | 5.17  |
| Eaton Wash           | EA39 | 400534.5 | 3786264.5 | 8369.2  | 8367.2  | 913.1  | 911.3  | 1.9  | 0.9 | 0.13 | 0.15 | 90.01   | 1.80  |
| Eaton Wash           | EA40 | 400459.5 | 3786259.5 | 8264.4  | 8262.0  | 899.8  | 897.9  | 1.9  | 0.9 | 0.11 | 0.13 | 105.23  | 1.92  |
| Eaton Wash           | EA41 | 400458.5 | 3786251.5 | 8253.8  | 8250.3  | 896.8  | 893.1  | 1.9  | 0.9 | 0.13 | 0.41 | 11.66   | 3.65  |
| Eaton Wash           | EA42 | 400370.5 | 3786145.5 | 8078.5  | 8075.5  | 876.8  | 875.0  | 1.9  | 0.8 | 0.09 | 0.10 | 174.82  | 1.83  |
| Eaton Wash           | EA43 | 400352.5 | 3786169.5 | 8042.1  | 8037.7  | 871.2  | 867.2  | 1.9  | 0.8 | 0.11 | 0.21 | 37.80   | 4.06  |
| Eaton Wash           | EA44 | 400337.5 | 3786181.5 | 8019.8  | 8013.4  | 863.6  | 850.9  | 1.9  | 0.8 | 0.20 | 0.67 | 24.31   | 12.76 |
| Eaton Wash           | EA45 | 400282.5 | 3786170.5 | 7951.3  | 7949.3  | 843.7  | 841.9  | 1.9  | 0.8 | 0.11 | 0.14 | 64.11   | 1.85  |
| Eaton Wash           | EA46 | 400433.5 | 3785804.5 | 7808.4  | 7799.0  | 854.4  | 844.3  | 1.1  | 1.0 | N.D. | N.D. | N.D.    | N.D.  |
| Eaton Wash           | EA47 | 400430.5 | 3785814.5 | 7796.6  | 7794.2  | 843.3  | 841.4  | 1.1  | 1.0 | 0.41 | 0.60 | 4.83    | 1.93  |
| El Prieto Canyon     | EL1  | 394009.5 | 3787600.5 | 3742.5  | 3738.1  | 692.9  | 689.8  | 1.1  | 1.0 | N.D. | N.D. | N.D.    | N.D.  |
| El Prieto Canyon     | EL2  | 393967.5 | 3787463.5 | 3582.3  | 3578.5  | 669.6  | 665.7  | 1.2  | 0.9 | 0.13 | 0.15 | 159.61  | 3.83  |
| Fall Creek           | F1   | 393154.5 | 3798486.5 | 2663.6  | 2659.6  | 1008.8 | 1003.0 | 2.1  | 0.8 | N.D. | N.D. | N.D.    | N.D.  |
| Fall Creek           | F2   | 393157.5 | 3798481.5 | 2656.7  | 2652.9  | 1001.7 | 991.8  | 2.1  | 0.8 | 0.44 | 1.68 | 6.66    | 9.95  |
| Fall Creek           | F3   | 393169.5 | 3798447.5 | 2613.0  | 2605.6  | 986.1  | 975.0  | 2.1  | 0.8 | 0.14 | 0.35 | 47.28   | 11.08 |
| Fall Creek           | F4   | 393099.5 | 3798280.5 | 2388.3  | 2385.3  | 953.6  | 951.5  | 2.4  | 0.7 | 0.10 | 0.11 | 220.31  | 2.14  |
| Fall Creek           | F5   | 392939.5 | 3797466.5 | 1198.7  | 1196.3  | 869.0  | 867.1  | 3.5  | 0.3 | 0.07 | 0.07 | 1189.00 | 1.85  |
| Fall Creek           | F6   | 392921.5 | 3797386.5 | 1098.2  | 1095.3  | 861.7  | 860.1  | 3.5  | 0.3 | 0.05 | 0.07 | 100.98  | 1.67  |
| Fall Creek           | F7   | 392935.5 | 3797372.5 | 1077.2  | 1071.8  | 854.7  | 850.3  | 3.5  | 0.3 | 0.29 | 0.42 | 23.56   | 4.46  |
| Fall Creek           | F8   | 392948.5 | 3797349.5 | 1046.5  | 1033.2  | 848.6  | 831.9  | 3.5  | 0.3 | 0.07 | 0.48 | 38.56   | 16.64 |
| Fall Creek           | F9   | 392953.5 | 3797333.5 | 1028.4  | 1025.0  | 829.7  | 827.3  | 3.5  | 0.3 | 0.46 | 0.55 | 8.24    | 2.36  |
| Fall Creek           | F10  | 392959.5 | 3797327.5 | 1018.7  | 1013.9  | 824.9  | 818.4  | 3.5  | 0.3 | 0.39 | 0.81 | 11.07   | 6.52  |
| Fall Creek           | F11  | 392881.5 | 3796773.5 | 150.8   | 145.4   | 775.1  | 765.4  | 4.2  | 0.0 | 0.05 | 0.06 | 868.55  | 9.68  |
| Fall Creek           | F12  | 392884.5 | 3796757.5 | 130.5   | 122.6   | 763.4  | 752.5  | 4.2  | 0.0 | 0.14 | 0.57 | 22.73   | 10.83 |
| Fall Creek           | F13  | 392889.5 | 3796746.5 | 114.0   | 110.0   | 752.0  | 745.7  | 4.2  | 0.0 | 0.06 | 0.54 | 12.66   | 6.31  |
| Fall Creek           | F14  | 392894.5 | 3796727.5 | 88.7    | 79.8    | 744.6  | 722.9  | 4.2  | 0.0 | 0.05 | 0.76 | 30.14   | 21.71 |
| Falls Canyon         | FA1  | 400724.5 | 3789761.5 | 1487.9  | 1485.5  | 1214.5 | 1212.9 | 1.2  | 0.9 | N.D. | N.D. | N.D.    | N.D.  |
| Falls Canyon         | FA2  | 400875.5 | 3790275.5 | 820.2   | 817.7   | 1129.2 | 1127.7 | 1.8  | 0.5 | 0.13 | 0.13 | 667.78  | 1.51  |
| Falls Canyon         | FA3  | 400905.5 | 3790286.5 | 782.5   | 773.3   | 1124.1 | 1116.4 | 1.8  | 0.5 | 0.10 | 0.25 | 44.46   | 7.78  |
| Fern Canyon          | FE1  | 392574.5 | 3787922.5 | 2210.6  | 2206.6  | 607.0  | 604.7  | 1.7  | 0.8 | N.D. | N.D. | N.D.    | N.D.  |
| Fox Creek            | FO1  | 391430.5 | 3797424.5 | 2495.4  | 2493.4  | 903.5  | 901.8  | 8.8  | 0.3 | N.D. | N.D. | N.D.    | N.D.  |
| Fox Creek            | FO2  | 391463.5 | 3797390.5 | 2438.5  | 2431.7  | 896.5  | 884.2  | 8.8  | 0.3 | 0.10 | 0.29 | 61.77   | 12.28 |
| Fox Creek            | FO3  | 391481.5 | 3797388.5 | 2418.0  | 2416.0  | 883.6  | 881.1  | 8.8  | 0.3 | 0.04 | 0.20 | 15.66   | 2.56  |
| Fox Creek            | FO4  | 391495.5 | 3797398.5 | 2397.0  | 2393.5  | 879.1  | 872.6  | 8.8  | 0.3 | 0.10 | 0.38 | 22.49   | 6.47  |
| Fox Creek            | FO5  | 391501.5 | 3797417.5 | 2374.1  | 2371.1  | 871.6  | 867.9  | 8.8  | 0.3 | 0.05 | 0.21 | 22.49   | 3.71  |
| Fox Creek            | FO6  | 391559.5 | 3797458.5 | 2287.3  | 2275.8  | 861.7  | 833.7  | 8.8  | 0.3 | 0.07 | 0.36 | 95.23   | 28.04 |
| Fox Creek            | FO7  | 391579.5 | 3797472.5 | 2259.8  | 2254.5  | 833.0  | 826.7  | 8.8  | 0.3 | 0.04 | 0.33 | 21.31   | 6.24  |
| Fox Creek            | FO8  | 391595.5 | 3797478.5 | 2239.9  | 2236.4  | 825.9  | 822.9  | 8.8  | 0.3 | 0.06 | 0.21 | 18.07   | 3.02  |
| Fox Creek            | FO9  | 391606.5 | 3797484.5 | 2226.4  | 2221.5  | 821.3  | 816.6  | 8.8  | 0.3 | 0.15 | 0.42 | 14.90   | 4.71  |
| Fox Creek            | FO10 | 391611.5 | 3797487.5 | 2220.1  | 2216.7  | 816.1  | 812.5  | 8.8  | 0.3 | 0.39 | 0.85 | 4.83    | 3.56  |

|                         |       |          |           |        |        |       |       |      |     |      |      |         |       |
|-------------------------|-------|----------|-----------|--------|--------|-------|-------|------|-----|------|------|---------|-------|
| Fox Creek               | FO11  | 391529.5 | 3796512.5 | 534.4  | 527.7  | 726.3 | 709.6 | 10.5 | 0.1 | 0.05 | 0.06 | 1688.97 | 16.78 |
| Fusier Canyon           | FU1   | 389098.5 | 3796049.5 | 3469.4 | 3465.9 | 925.5 | 922.6 | 1.2  | 1.0 | N.D. | N.D. | N.D.    | N.D.  |
| Fusier Canyon           | FU2   | 389096.5 | 3796043.5 | 3461.9 | 3459.9 | 922.0 | 920.4 | 1.2  | 1.0 | 0.16 | 0.37 | 6.00    | 1.56  |
| Fusier Canyon           | FU3   | 388801.5 | 3795524.5 | 2555.2 | 2549.9 | 852.5 | 849.0 | 1.5  | 0.7 | 0.08 | 0.08 | 909.99  | 3.49  |
| Fusier Canyon           | FU4   | 388793.5 | 3795533.5 | 2542.3 | 2536.0 | 848.5 | 843.2 | 1.5  | 0.7 | 0.06 | 0.42 | 13.90   | 5.29  |
| Fusier Canyon           | FU5   | 388753.5 | 3795515.5 | 2468.7 | 2460.4 | 838.7 | 831.6 | 1.6  | 0.7 | 0.07 | 0.15 | 75.60   | 7.13  |
| Fusier Canyon           | FU6   | 388750.5 | 3795507.5 | 2459.4 | 2453.4 | 831.1 | 821.5 | 1.6  | 0.7 | 0.52 | 1.44 | 7.00    | 9.55  |
| Fusier Canyon           | FU7   | 388748.5 | 3795399.5 | 2307.3 | 2303.5 | 811.0 | 807.8 | 1.6  | 0.7 | 0.07 | 0.09 | 149.95  | 3.22  |
| Fusier Canyon           | FU8   | 388819.5 | 3795323.5 | 2142.6 | 2139.6 | 798.5 | 795.6 | 1.6  | 0.6 | 0.06 | 0.07 | 163.85  | 2.84  |
| Fusier Canyon           | FU9   | 388854.5 | 3795241.5 | 1988.2 | 1985.8 | 787.3 | 784.8 | 1.7  | 0.6 | 0.06 | 0.07 | 153.85  | 2.51  |
| Fusier Canyon           | FU10  | 388608.5 | 3795129.5 | 1343.2 | 1338.4 | 749.8 | 743.6 | 1.7  | 0.4 | 0.05 | 0.06 | 647.38  | 6.29  |
| Grizzly Creek           | G1    | 389088.5 | 3792773.5 | 1129.9 | 1125.7 | 762.8 | 759.8 | 1.3  | 1.0 | N.D. | N.D. | N.D.    | N.D.  |
| Grizzly Creek           | G2    | 389009.5 | 3792895.5 | 961.7  | 959.3  | 744.8 | 742.5 | 1.7  | 0.8 | 0.09 | 0.10 | 166.41  | 2.30  |
| Grizzly Creek           | G3    | 388994.5 | 3792909.5 | 938.6  | 935.1  | 739.1 | 736.7 | 1.8  | 0.8 | 0.16 | 0.24 | 24.14   | 2.44  |
| Grizzly Creek           | G4    | 388964.5 | 3792938.5 | 888.1  | 886.1  | 733.1 | 731.4 | 1.8  | 0.8 | 0.08 | 0.11 | 49.04   | 1.69  |
| Grizzly Creek           | G5    | 388948.5 | 3792948.5 | 864.8  | 862.0  | 728.9 | 727.2 | 1.8  | 0.7 | 0.12 | 0.17 | 24.14   | 1.64  |
| Grizzly Creek           | G6    | 388936.5 | 3792970.5 | 837.8  | 831.6  | 723.9 | 719.6 | 1.8  | 0.7 | 0.14 | 0.25 | 30.38   | 4.35  |
| Grizzly Creek           | G7    | 388886.5 | 3793002.5 | 770.0  | 766.6  | 706.9 | 704.2 | 1.8  | 0.7 | 0.21 | 0.24 | 65.01   | 2.68  |
| Grizzly Creek           | G8    | 388666.5 | 3793194.5 | 384.7  | 380.7  | 661.2 | 658.5 | 2.0  | 0.3 | 0.11 | 0.12 | 385.85  | 2.75  |
| Grizzly Creek           | G9    | 388653.5 | 3793200.5 | 369.2  | 359.2  | 654.8 | 639.2 | 2.0  | 0.3 | 0.32 | 0.89 | 21.56   | 15.58 |
| Grizzly Creek           | G10   | 388650.5 | 3793239.5 | 316.9  | 314.1  | 633.9 | 631.7 | 2.9  | 0.3 | 0.13 | 0.17 | 45.04   | 2.17  |
| Grotto Creek            | GR1   | 397047.5 | 3797035.5 | 122.6  | 120.2  | 952.5 | 950.4 | 1.4  | 0.3 | N.D. | N.D. | N.D.    | N.D.  |
| Grotto Creek            | GR2   | 397055.5 | 3797057.5 | 95.0   | 85.4   | 946.1 | 938.1 | 1.4  | 0.2 | 0.17 | 0.36 | 34.80   | 7.98  |
| Haines Canyon           | H1    | 383686.5 | 3792400.5 | 1859.9 | 1857.1 | 850.5 | 846.6 | 2.3  | 0.6 | N.D. | N.D. | N.D.    | N.D.  |
| Haines Canyon           | H2    | 383518.5 | 3792372.5 | 1654.0 | 1650.6 | 829.3 | 825.1 | 2.3  | 0.5 | 0.09 | 0.10 | 206.51  | 4.22  |
| Haines Canyon           | H3    | 383195.5 | 3792398.5 | 1245.8 | 1243.8 | 782.7 | 780.2 | 2.5  | 0.4 | 0.10 | 0.11 | 406.75  | 2.41  |
| Haines Canyon           | H4    | 382807.5 | 3791895.5 | 474.1  | 472.7  | 711.3 | 709.4 | 3.5  | 0.1 | 0.09 | 0.09 | 771.16  | 1.88  |
| Haines Canyon           | H5    | 382803.5 | 3791885.5 | 460.8  | 459.3  | 708.0 | 706.0 | 3.5  | 0.1 | 0.12 | 0.26 | 13.31   | 1.96  |
| Haines Canyon           | H6    | 382722.5 | 3791824.5 | 340.9  | 338.5  | 699.7 | 697.6 | 3.6  | 0.1 | 0.05 | 0.07 | 120.88  | 2.11  |
| Haines Canyon           | H7    | 382710.5 | 3791829.5 | 324.6  | 322.6  | 695.8 | 693.7 | 3.6  | 0.1 | 0.13 | 0.25 | 15.90   | 2.14  |
| Little Santa Anita Wash | LSA1  | 402857.5 | 3785087.5 | 6839.2 | 6835.4 | 974.5 | 972.3 | 1.1  | 1.0 | N.D. | N.D. | N.D.    | N.D.  |
| Little Santa Anita Wash | LSA2  | 403049.5 | 3784457.5 | 5913.2 | 5909.8 | 851.5 | 847.8 | 1.7  | 0.9 | 0.13 | 0.13 | 925.57  | 3.70  |
| Little Santa Anita Wash | LSA3  | 403049.5 | 3784446.5 | 5898.3 | 5895.9 | 846.5 | 844.6 | 1.7  | 0.9 | 0.11 | 0.23 | 13.90   | 1.93  |
| Little Santa Anita Wash | LSA4  | 403490.5 | 3784035.5 | 5118.5 | 5115.1 | 766.5 | 764.3 | 3.1  | 0.7 | 0.10 | 0.10 | 780.78  | 2.16  |
| Little Santa Anita Wash | LSA5  | 403884.5 | 3783554.5 | 4225.6 | 4221.2 | 680.7 | 677.1 | 4.7  | 0.6 | 0.09 | 0.10 | 893.96  | 3.65  |
| Little Santa Anita Wash | LSA6  | 403881.5 | 3783492.5 | 4149.5 | 4147.1 | 670.6 | 668.4 | 4.8  | 0.6 | 0.09 | 0.12 | 74.11   | 2.19  |
| Little Santa Anita Wash | LSA7  | 403609.5 | 3782987.5 | 3126.9 | 3124.0 | 577.8 | 576.0 | 5.4  | 0.5 | 0.09 | 0.09 | 1023.02 | 1.79  |
| Little Santa Anita Wash | LSA8  | 403679.5 | 3782945.5 | 3004.3 | 2996.9 | 563.7 | 556.3 | 5.5  | 0.4 | 0.10 | 0.15 | 127.15  | 7.35  |
| Little Santa Anita Wash | LSA9  | 403680.5 | 3782922.5 | 2974.7 | 2970.9 | 552.5 | 548.2 | 5.5  | 0.4 | 0.17 | 0.31 | 25.97   | 4.31  |
| Little Santa Anita Wash | LSA10 | 403697.5 | 3782896.5 | 2940.3 | 2938.3 | 545.7 | 544.2 | 5.5  | 0.4 | 0.08 | 0.12 | 32.63   | 1.52  |
| Little Santa Anita Wash | LSA11 | 403698.5 | 3782882.5 | 2923.6 | 2920.2 | 541.8 | 538.8 | 5.5  | 0.4 | 0.17 | 0.30 | 18.07   | 3.01  |
| Little Santa Anita Wash | LSA12 | 403706.5 | 3782850.5 | 2887.5 | 2881.7 | 535.3 | 527.2 | 5.5  | 0.4 | 0.11 | 0.30 | 38.56   | 8.10  |
| Little Santa Anita Wash | LSA13 | 403703.5 | 3782826.5 | 2861.4 | 2857.0 | 524.0 | 518.4 | 5.5  | 0.4 | 0.16 | 0.36 | 24.66   | 5.66  |
| Little Santa Anita Wash | LSA14 | 403709.5 | 3782757.5 | 2780.2 | 2777.8 | 507.5 | 505.7 | 5.6  | 0.4 | 0.14 | 0.16 | 79.18   | 1.79  |
| Little Santa Anita Wash | LSA15 | 403721.5 | 3782715.5 | 2730.0 | 2724.1 | 499.6 | 494.2 | 5.6  | 0.4 | 0.13 | 0.21 | 53.70   | 5.43  |
| Little Santa Anita Wash | LSA16 | 403675.5 | 3782677.5 | 2660.7 | 2656.7 | 484.7 | 480.6 | 5.6  | 0.4 | 0.15 | 0.20 | 67.43   | 4.06  |
| Little Santa Anita Wash | LSA17 | 403690.5 | 3782584.5 | 2542.7 | 2539.9 | 463.6 | 461.7 | 5.7  | 0.4 | 0.15 | 0.16 | 116.81  | 1.92  |
| Little Santa Anita Wash | LSA18 | 403700.5 | 3782459.5 | 2357.4 | 2354.0 | 442.1 | 437.6 | 5.7  | 0.3 | 0.11 | 0.13 | 185.89  | 4.54  |
| Little Santa Anita Wash | LSA19 | 403870.5 | 3782431.5 | 1938.2 | 1936.2 | 394.1 | 391.3 | 5.8  | 0.3 | 0.10 | 0.11 | 417.79  | 2.85  |
| Little Santa Anita Wash | LSA20 | 403907.5 | 3782490.5 | 1860.7 | 1854.9 | 384.4 | 379.3 | 5.8  | 0.3 | 0.09 | 0.15 | 81.33   | 5.10  |
| Little Santa Anita Wash | LSA21 | 403896.5 | 3782176.5 | 1369.7 | 1365.7 | 340.2 | 336.1 | 6.4  | 0.2 | 0.08 | 0.09 | 489.19  | 4.12  |
| Lukens Canyon           | L1    | 386340.5 | 3794259.5 | 750.3  | 732.5  | 770.1 | 746.7 | 1.1  | 1.0 | N.D. | N.D. | N.D.    | N.D.  |
| Lukens Canyon           | L2    | 386346.5 | 3794281.5 | 725.2  | 718.8  | 745.2 | 732.7 | 1.1  | 0.9 | 0.22 | 1.03 | 13.66   | 12.50 |
| Lukens Canyon           | L3    | 386385.5 | 3794324.5 | 654.4  | 649.6  | 715.9 | 712.2 | 1.1  | 0.8 | 0.26 | 0.30 | 69.18   | 3.65  |
| Lukens Canyon           | L4    | 386389.5 | 3794330.5 | 646.8  | 644.4  | 710.6 | 708.7 | 1.1  | 0.8 | 0.56 | 0.67 | 5.24    | 1.92  |
| Lukens Canyon           | L5    | 386400.5 | 3794340.5 | 629.3  | 622.6  | 702.8 | 693.2 | 1.1  | 0.8 | 0.39 | 0.71 | 21.73   | 9.61  |
| Lukens Canyon           | L6    | 386436.5 | 3794371.5 | 573.2  | 568.9  | 684.6 | 681.6 | 1.1  | 0.7 | 0.17 | 0.22 | 53.70   | 2.94  |
| Lukens Canyon           | L7    | 386450.5 | 3794398.5 | 540.4  | 530.3  | 676.5 | 664.0 | 1.1  | 0.7 | 0.18 | 0.46 | 38.63   | 12.47 |
| Lukens Canyon           | L8    | 386462.5 | 3794415.5 | 517.8  | 513.4  | 661.2 | 656.2 | 1.2  | 0.7 | 0.23 | 0.46 | 16.90   | 4.99  |
| Lukens Canyon           | L9    | 386469.5 | 3794429.5 | 500.9  | 496.5  | 654.8 | 649.7 | 1.2  | 0.6 | 0.12 | 0.39 | 16.90   | 5.08  |
| Lukens Canyon           | L10   | 386476.5 | 3794440.5 | 486.4  | 480.6  | 647.3 | 636.5 | 1.2  | 0.6 | 0.24 | 0.83 | 15.90   | 10.81 |
| Lukens Canyon           | L11   | 386483.5 | 3794456.5 | 466.7  | 461.9  | 634.0 | 623.6 | 1.2  | 0.6 | 0.17 | 0.69 | 18.73   | 10.48 |
| Millard Creek           | M1    | 395836.5 | 3787997.5 | 6630.7 | 6628.7 | 948.5 | 946.7 | 2.7  | 0.8 | N.D. | N.D. | N.D.    | N.D.  |
| Millard Creek           | M2    | 395980.5 | 3787850.5 | 6340.2 | 6337.8 | 917.5 | 915.4 | 2.8  | 0.8 | 0.10 | 0.11 | 290.88  | 2.15  |
| Millard Creek           | M3    | 395961.5 | 3787734.5 | 6137.6 | 6134.6 | 889.2 | 886.5 | 2.8  | 0.8 | 0.13 | 0.14 | 203.17  | 2.79  |
| Millard Creek           | M4    | 395963.5 | 3787701.5 | 6097.7 | 6094.8 | 882.6 | 880.8 | 3.0  | 0.8 | 0.11 | 0.14 | 39.80   | 1.75  |
| Millard Creek           | M5    | 395659.5 | 3787359.5 | 5491.3 | 5488.3 | 801.7 | 799.5 | 3.4  | 0.7 | 0.13 | 0.13 | 606.51  | 2.27  |
| Millard Creek           | M6    | 395669.5 | 3787352.5 | 5475.2 | 5473.2 | 797.6 | 796.0 | 3.4  | 0.7 | 0.15 | 0.23 | 15.07   | 1.56  |
| Millard Creek           | M7    | 395671.5 | 3787338.5 | 5458.8 | 5455.3 | 795.6 | 792.6 | 3.4  | 0.7 | 0.03 | 0.19 | 17.90   | 3.00  |
| Millard Creek           | M8    | 395665.5 | 3787313.5 | 5429.0 | 5425.0 | 789.9 | 786.4 | 3.4  | 0.7 | 0.10 | 0.20 | 30.31   | 3.49  |
| Millard Creek           | M9    | 395661.5 | 3787286.5 | 5397.9 | 5394.9 | 778.9 | 776.9 | 3.5  | 0.7 | 0.28 | 0.32 | 30.14   | 2.01  |
| Millard Creek           | M10   | 395664.5 | 3787280.5 | 5390.1 | 5387.6 | 775.9 | 773.9 | 3.5  | 0.7 | 0.20 | 0.42 | 7.24    | 2.07  |
| Millard Creek           | M11   | 394834.5 | 3787038.5 | 3745.1 | 3742.7 | 647.5 | 645.1 | 5.1  | 0.5 | 0.08 | 0.08 | 1644.97 | 2.37  |
| Millard Creek           | M12   | 394831.5 | 3787036.5 | 3741.3 | 3735.0 | 644.1 | 627.8 | 5.1  | 0.5 | 0.67 | 2.26 | 7.66    | 16.34 |
| Pasadena Canyon         | PA1   | 401055.5 | 3783873.5 | 2803.9 | 2801.9 | 683.1 | 681.0 | 1.4  | 0.9 | N.D. | N.D. | N.D.    | N.D.  |
| Pasadena Canyon         | PA2   | 401019.5 | 3783823.5 | 2726.7 | 2721.5 | 673.7 | 668.9 | 1.4  | 0.9 | 0.10 | 0.15 | 80.40   | 4.83  |
| Pasadena Canyon         | PA3   | 401011.5 | 3783814.5 | 2713.8 | 2704.8 | 667.0 | 654.4 | 1.4  | 0.9 | 0.25 | 0.87 | 16.66   | 12.62 |
| Pasadena Canyon         | PA4   | 401012.5 | 3783800.5 | 2699.4 | 2696.4 | 654.1 | 651.8 | 1.4  | 0.8 | 0.04 | 0.31 | 8.41    | 2.36  |
| Pasadena Canyon         | PA5   | 401010.5 | 3783793.5 | 2691.6 | 2686.6 | 651.1 | 645.2 | 1.4  | 0.8 | 0.15 | 0.67 | 9.83    | 5.88  |
| Pasadena Canyon         | PA6   | 400946.5 | 3783723.5 | 2580.5 | 2578.5 | 635.6 | 633.2 | 1.5  | 0.8 | 0.09 | 0.11 | 108.05  | 2.42  |



|                  |      |          |           |        |        |        |        |     |     |      |      |         |       |
|------------------|------|----------|-----------|--------|--------|--------|--------|-----|-----|------|------|---------|-------|
| Pasadena Canyon  | PA7  | 400799.5 | 3783519.5 | 2263.6 | 2261.6 | 594.9  | 593.3  | 1.7 | 0.7 | 0.12 | 0.13 | 316.89  | 1.58  |
| Pasadena Canyon  | PA8  | 400832.5 | 3783486.5 | 2211.7 | 2207.3 | 588.5  | 583.1  | 1.7 | 0.7 | 0.10 | 0.19 | 54.36   | 5.35  |
| Pasadena Canyon  | PA9  | 400825.5 | 3783425.5 | 2059.9 | 2057.1 | 569.3  | 566.8  | 1.7 | 0.6 | 0.09 | 0.11 | 150.20  | 2.48  |
| Pasadena Canyon  | PA10 | 400826.5 | 3783421.5 | 2054.7 | 2049.4 | 565.8  | 561.4  | 1.8 | 0.6 | 0.44 | 0.71 | 7.66    | 4.38  |
| Pasadena Canyon  | PA11 | 400806.5 | 3783340.5 | 1953.1 | 1950.7 | 553.5  | 551.2  | 1.8 | 0.6 | 0.08 | 0.10 | 98.74   | 2.27  |
| Pasadena Canyon  | PA12 | 400814.5 | 3783312.5 | 1919.0 | 1914.7 | 548.1  | 544.5  | 1.8 | 0.6 | 0.10 | 0.19 | 35.97   | 3.59  |
| Pasadena Canyon  | PA13 | 400876.5 | 3783292.5 | 1832.0 | 1829.0 | 536.3  | 533.8  | 1.8 | 0.6 | 0.10 | 0.12 | 85.77   | 2.53  |
| Pasadena Canyon  | PA14 | 400898.5 | 3783253.5 | 1775.5 | 1772.5 | 528.8  | 524.9  | 1.9 | 0.6 | 0.09 | 0.16 | 56.46   | 3.96  |
| Pasadena Canyon  | PA15 | 400844.5 | 3783217.5 | 1682.0 | 1679.6 | 517.5  | 515.4  | 2.0 | 0.5 | 0.08 | 0.10 | 92.91   | 2.10  |
| Pasadena Canyon  | PA16 | 400759.5 | 3783193.5 | 1558.0 | 1554.6 | 506.6  | 501.6  | 2.0 | 0.5 | 0.07 | 0.11 | 124.95  | 5.02  |
| Pasadena Canyon  | PA17 | 400734.5 | 3783190.5 | 1525.9 | 1522.5 | 499.1  | 493.8  | 2.0 | 0.5 | 0.09 | 0.24 | 32.14   | 5.23  |
| Pasadena Canyon  | PA18 | 400712.5 | 3783190.5 | 1496.7 | 1494.3 | 488.4  | 485.5  | 2.0 | 0.5 | 0.21 | 0.30 | 28.21   | 2.91  |
| Pasadena Canyon  | PA19 | 400646.5 | 3783095.5 | 1353.9 | 1351.5 | 464.3  | 462.2  | 2.0 | 0.4 | 0.15 | 0.16 | 142.78  | 2.15  |
| Pasadena Canyon  | PA20 | 400605.5 | 3783040.5 | 1264.8 | 1258.5 | 448.0  | 442.1  | 2.0 | 0.4 | 0.16 | 0.22 | 92.98   | 5.85  |
| Pasadena Canyon  | PA21 | 400567.5 | 3782372.5 | 462.0  | 459.6  | 380.0  | 378.4  | 2.2 | 0.1 | 0.08 | 0.08 | 798.90  | 1.65  |
| Pipe Canyon      | P1   | 381889.5 | 3795154.5 | 471.2  | 468.8  | 529.2  | 527.3  | 1.4 | 0.3 | N.D. | N.D. | N.D.    | N.D.  |
| Pipe Canyon      | P2   | 381886.5 | 3795159.5 | 464.9  | 460.5  | 526.2  | 521.5  | 1.4 | 0.3 | 0.28 | 0.70 | 8.24    | 4.73  |
| Pipe Canyon      | P3   | 381875.5 | 3795246.5 | 258.7  | 253.5  | 496.2  | 491.9  | 1.4 | 0.2 | 0.13 | 0.14 | 207.04  | 4.28  |
| Pipe Canyon      | P4   | 381675.5 | 3795288.5 | 6.2    | 2.4    | 464.0  | 460.9  | 1.5 | 0.0 | 0.11 | 0.12 | 251.08  | 3.10  |
| Rubio Canyon     | R1   | 397160.5 | 3786080.5 | 1743.8 | 1741.8 | 798.6  | 796.8  | 1.3 | 0.7 | N.D. | N.D. | N.D.    | N.D.  |
| Rubio Canyon     | R2   | 397176.5 | 3786037.5 | 1691.7 | 1688.7 | 792.5  | 789.5  | 1.3 | 0.7 | 0.09 | 0.14 | 53.11   | 3.07  |
| Rubio Canyon     | R3   | 397332.5 | 3785955.5 | 1446.2 | 1441.8 | 757.6  | 753.3  | 1.4 | 0.6 | 0.13 | 0.15 | 246.89  | 4.35  |
| Rubio Canyon     | R4   | 397280.5 | 3785907.5 | 1354.7 | 1352.3 | 741.2  | 738.8  | 2.2 | 0.6 | 0.14 | 0.16 | 89.50   | 2.41  |
| Rubio Canyon     | R5   | 397273.5 | 3785899.5 | 1342.6 | 1340.2 | 736.9  | 735.3  | 2.2 | 0.6 | 0.20 | 0.29 | 12.07   | 1.58  |
| Rubio Canyon     | R6   | 397230.5 | 3785830.5 | 1242.5 | 1231.3 | 723.3  | 699.8  | 2.3 | 0.5 | 0.12 | 0.33 | 108.91  | 23.47 |
| Rubio Canyon     | R7   | 397226.5 | 3785810.5 | 1220.0 | 1214.6 | 699.5  | 692.8  | 2.3 | 0.5 | 0.03 | 0.42 | 16.66   | 6.67  |
| Rubio Canyon     | R8   | 397225.5 | 3785790.5 | 1195.7 | 1192.3 | 689.0  | 685.2  | 2.3 | 0.5 | 0.20 | 0.34 | 22.31   | 3.78  |
| Rubio Canyon     | R9   | 397179.5 | 3785776.5 | 1128.1 | 1123.3 | 676.5  | 671.6  | 2.3 | 0.5 | 0.14 | 0.20 | 69.01   | 4.89  |
| Rubio Canyon     | R10  | 397173.5 | 3785770.5 | 1117.9 | 1113.9 | 670.4  | 662.6  | 2.3 | 0.5 | 0.23 | 0.96 | 9.41    | 7.77  |
| Rubio Canyon     | R11  | 397152.5 | 3785726.5 | 1063.2 | 1059.2 | 653.3  | 644.9  | 2.3 | 0.5 | 0.18 | 0.32 | 54.70   | 8.34  |
| Rubio Canyon     | R12  | 397151.5 | 3785716.5 | 1051.4 | 1047.4 | 643.2  | 638.9  | 2.3 | 0.5 | 0.22 | 0.51 | 11.83   | 4.31  |
| Rush Creek       | RU1  | 403087.5 | 3789368.5 | 911.5  | 905.5  | 1063.9 | 1057.6 | 1.0 | 1.0 | N.D. | N.D. | N.D.    | N.D.  |
| Rush Creek       | RU2  | 403134.5 | 3789405.5 | 828.2  | 810.1  | 1047.2 | 1030.2 | 1.0 | 0.9 | 0.13 | 0.29 | 95.43   | 17.06 |
| Santa Anita Wash | SA1  | 409398.5 | 3785977.5 | 4797.6 | 4794.2 | 1229.1 | 1226.4 | 1.0 | 1.0 | N.D. | N.D. | N.D.    | N.D.  |
| Santa Anita Wash | SA2  | 409344.5 | 3785882.5 | 4658.7 | 4655.7 | 1204.0 | 1201.6 | 1.3 | 1.0 | 0.17 | 0.18 | 138.47  | 2.37  |
| Santa Anita Wash | SA3  | 409231.5 | 3785895.5 | 4519.1 | 4516.1 | 1176.3 | 1173.6 | 1.3 | 0.9 | 0.19 | 0.20 | 139.64  | 2.67  |
| Santa Anita Wash | SA4  | 409188.5 | 3785896.5 | 4469.9 | 4467.9 | 1164.3 | 1162.8 | 1.6 | 0.9 | 0.20 | 0.22 | 48.21   | 1.51  |
| Santa Anita Wash | SA5  | 409096.5 | 3785870.5 | 4357.3 | 4351.0 | 1148.7 | 1141.9 | 1.6 | 0.9 | 0.13 | 0.18 | 116.81  | 6.82  |
| Santa Anita Wash | SA6  | 409067.5 | 3785859.5 | 4323.1 | 4320.1 | 1139.5 | 1137.1 | 1.6 | 0.9 | 0.09 | 0.16 | 30.90   | 2.46  |
| Santa Anita Wash | SA7  | 408286.5 | 3785723.5 | 3167.0 | 3163.6 | 993.6  | 990.6  | 3.0 | 0.7 | 0.12 | 0.13 | 1156.51 | 3.00  |
| Santa Anita Wash | SA8  | 408062.5 | 3785921.5 | 2626.1 | 2623.1 | 927.2  | 924.8  | 3.3 | 0.5 | 0.12 | 0.12 | 540.53  | 2.31  |
| Santa Anita Wash | SA9  | 407298.5 | 3786129.5 | 1565.5 | 1562.1 | 821.2  | 818.2  | 4.2 | 0.3 | 0.10 | 0.10 | 1061.03 | 3.03  |
| Santa Anita Wash | SA10 | 407217.5 | 3786171.5 | 1458.0 | 1454.2 | 801.6  | 798.9  | 4.2 | 0.3 | 0.16 | 0.18 | 107.88  | 2.71  |
| Santa Anita Wash | SA11 | 407199.5 | 3786205.5 | 1416.0 | 1402.1 | 795.0  | 770.5  | 4.2 | 0.3 | 0.10 | 0.55 | 52.11   | 24.53 |
| Santa Anita Wash | SA12 | 407107.5 | 3786144.5 | 1274.4 | 1271.4 | 760.2  | 758.1  | 6.3 | 0.3 | 0.08 | 0.09 | 130.71  | 2.14  |
| Santa Anita Wash | SA13 | 407046.5 | 3786088.5 | 1177.9 | 1175.5 | 743.8  | 742.3  | 6.4 | 0.2 | 0.15 | 0.16 | 95.91   | 1.54  |
| Santa Anita Wash | SA14 | 407032.5 | 3786077.5 | 1156.1 | 1151.9 | 738.8  | 733.0  | 6.4 | 0.2 | 0.18 | 0.39 | 23.56   | 5.78  |
| Santa Anita Wash | SA15 | 406686.5 | 3785962.5 | 630.3  | 625.5  | 678.1  | 674.1  | 6.8 | 0.1 | 0.11 | 0.11 | 526.45  | 3.99  |
| Santa Anita Wash | SA16 | 406683.5 | 3785914.5 | 568.5  | 564.7  | 671.4  | 668.8  | 6.9 | 0.1 | 0.05 | 0.09 | 60.77   | 2.61  |
| Santa Anita Wash | SA17 | 406610.5 | 3785812.5 | 395.1  | 389.4  | 644.1  | 640.2  | 6.9 | 0.1 | 0.15 | 0.16 | 175.24  | 3.88  |
| Santa Anita Wash | SA18 | 406397.5 | 3785753.5 | 91.4   | 87.4   | 613.2  | 610.1  | 7.0 | 0.0 | 0.09 | 0.10 | 302.05  | 3.19  |
| Santa Anita Wash | SA19 | 407583.5 | 3786708.5 | 2352.7 | 2350.7 | 976.1  | 974.3  | 1.4 | 0.9 | N.D. | N.D. | N.D.    | N.D.  |
| Santa Anita Wash | SA20 | 407579.5 | 3786673.5 | 2311.3 | 2308.4 | 971.8  | 969.9  | 1.4 | 0.8 | 0.06 | 0.10 | 42.21   | 1.82  |
| Santa Anita Wash | SA21 | 407503.5 | 3786605.5 | 2162.8 | 2158.6 | 951.4  | 948.8  | 1.8 | 0.8 | 0.13 | 0.14 | 149.88  | 2.62  |
| Santa Anita Wash | SA22 | 407493.5 | 3786599.5 | 2150.3 | 2147.9 | 947.3  | 945.3  | 1.8 | 0.8 | 0.18 | 0.33 | 10.66   | 2.07  |
| Santa Anita Wash | SA23 | 407393.5 | 3786574.5 | 1987.6 | 1979.4 | 926.3  | 917.6  | 1.8 | 0.7 | 0.12 | 0.16 | 168.51  | 8.62  |
| Santa Anita Wash | SA24 | 407292.5 | 3786505.5 | 1827.0 | 1824.0 | 899.8  | 895.5  | 1.9 | 0.7 | 0.12 | 0.14 | 155.37  | 4.34  |
| Santa Anita Wash | SA25 | 407274.5 | 3786473.5 | 1783.2 | 1780.4 | 888.1  | 886.3  | 1.9 | 0.6 | 0.18 | 0.21 | 43.63   | 1.77  |
| Santa Anita Wash | SA26 | 407266.5 | 3786461.5 | 1767.3 | 1763.9 | 886.3  | 881.8  | 1.9 | 0.6 | 0.00 | 0.28 | 16.49   | 4.55  |
| Santa Anita Wash | SA27 | 407263.5 | 3786456.5 | 1761.1 | 1757.3 | 881.4  | 874.9  | 1.9 | 0.6 | 0.13 | 1.03 | 6.66    | 6.51  |
| Santa Anita Wash | SA28 | 407222.5 | 3786376.5 | 1644.0 | 1641.6 | 855.8  | 853.3  | 1.9 | 0.6 | 0.17 | 0.19 | 115.67  | 2.47  |
| Santa Anita Wash | SA29 | 407173.5 | 3786370.5 | 1587.2 | 1579.2 | 847.3  | 837.5  | 1.9 | 0.6 | 0.11 | 0.25 | 62.38   | 9.81  |
| Santa Anita Wash | SA30 | 407158.5 | 3786318.5 | 1515.9 | 1511.1 | 827.4  | 823.6  | 2.0 | 0.6 | 0.16 | 0.20 | 68.11   | 3.71  |
| Santa Anita Wash | SA31 | 407175.5 | 3786284.5 | 1471.7 | 1465.7 | 814.7  | 809.4  | 2.1 | 0.5 | 0.23 | 0.31 | 45.38   | 5.32  |
| Santa Anita Wash | SA32 | 407170.5 | 3786260.5 | 1445.0 | 1441.6 | 805.2  | 801.0  | 2.1 | 0.5 | 0.20 | 0.35 | 24.07   | 4.21  |
| Santa Anita Wash | SA33 | 407166.5 | 3786233.5 | 1413.9 | 1391.2 | 795.6  | 770.7  | 2.1 | 0.5 | 0.19 | 0.60 | 50.46   | 24.95 |
| Silver Creek     | SL1  | 388081.5 | 3792912.5 | 942.8  | 940.8  | 737.2  | 735.6  | 1.2 | 1.0 | N.D. | N.D. | N.D.    | N.D.  |
| Silver Creek     | SL2  | 388084.5 | 3792918.5 | 935.6  | 926.7  | 734.2  | 725.5  | 1.2 | 1.0 | 0.26 | 0.72 | 14.07   | 8.69  |
| Silver Creek     | SL3  | 388103.5 | 3792970.5 | 859.8  | 857.4  | 708.5  | 706.8  | 1.2 | 0.9 | 0.25 | 0.27 | 69.36   | 1.75  |
| Silver Creek     | SL4  | 388114.5 | 3792976.5 | 844.9  | 835.8  | 704.4  | 682.8  | 1.2 | 0.9 | 0.19 | 1.11 | 21.56   | 21.69 |
| Silver Creek     | SL5  | 388149.5 | 3793018.5 | 784.3  | 780.9  | 674.5  | 670.0  | 1.2 | 0.8 | 0.16 | 0.23 | 54.94   | 4.49  |
| Silver Creek     | SL6  | 388156.5 | 3793023.5 | 775.2  | 761.7  | 668.5  | 643.2  | 1.2 | 0.8 | 0.27 | 1.40 | 19.14   | 25.22 |
| Strayns Canyon   | ST1  | 401538.5 | 3789299.5 | 1957.6 | 1954.2 | 1209.2 | 1206.4 | 1.2 | 0.9 | N.D. | N.D. | N.D.    | N.D.  |
| Strayns Canyon   | ST2  | 401542.5 | 3789382.5 | 1867.2 | 1864.7 | 1191.2 | 1189.7 | 1.2 | 0.9 | 0.17 | 0.19 | 89.46   | 1.55  |
| Strayns Canyon   | ST3  | 401761.5 | 3789793.5 | 1317.3 | 1313.9 | 1104.8 | 1102.3 | 1.4 | 0.6 | 0.15 | 0.16 | 550.81  | 2.52  |
| Strayns Canyon   | ST4  | 401873.5 | 3789857.5 | 1133.8 | 1131.4 | 1079.0 | 1077.3 | 1.9 | 0.5 | 0.13 | 0.14 | 182.58  | 1.73  |
| Strayns Canyon   | ST5  | 402024.5 | 3789972.5 | 917.3  | 915.3  | 1049.6 | 1048.0 | 2.2 | 0.4 | 0.13 | 0.14 | 216.04  | 1.59  |
| Strayns Canyon   | ST6  | 402096.5 | 3790009.5 | 813.3  | 811.3  | 1035.5 | 1033.9 | 2.2 | 0.4 | 0.12 | 0.14 | 104.05  | 1.61  |
| Sutton Canyon    | SU1  | 388003.5 | 3790258.5 | 2374.4 | 2372.0 | 876.2  | 874.1  | 1.0 | 0.9 | N.D. | N.D. | N.D.    | N.D.  |
| Sutton Canyon    | SU2  | 387960.5 | 3790209.5 | 2301.7 | 2298.9 | 863.2  | 861.4  | 1.1 | 0.9 | 0.15 | 0.17 | 73.08   | 1.80  |

|               |     |          |           |         |         |       |       |     |     |      |      |         |       |
|---------------|-----|----------|-----------|---------|---------|-------|-------|-----|-----|------|------|---------|-------|
| Sutton Canyon | SU3 | 387886.5 | 3790117.5 | 2160.5  | 2157.1  | 843.4 | 840.2 | 1.2 | 0.9 | 0.13 | 0.15 | 141.78  | 3.22  |
| Sutton Canyon | SU4 | 387520.5 | 3789925.5 | 1517.0  | 1514.0  | 764.8 | 761.8 | 1.4 | 0.6 | 0.12 | 0.12 | 643.16  | 3.04  |
| Sutton Canyon | SU5 | 387521.5 | 3789919.5 | 1510.6  | 1505.7  | 760.5 | 756.8 | 1.4 | 0.6 | 0.38 | 0.60 | 8.24    | 3.64  |
| Sutton Canyon | SU6 | 387510.5 | 3789907.5 | 1492.8  | 1489.4  | 753.3 | 748.5 | 1.4 | 0.6 | 0.27 | 0.51 | 16.31   | 4.80  |
| Sutton Canyon | SU7 | 387489.5 | 3789897.5 | 1467.1  | 1465.1  | 745.8 | 744.1 | 1.4 | 0.6 | 0.12 | 0.18 | 24.31   | 1.65  |
| Vogel Canyon  | V1  | 388403.5 | 3797178.5 | 4237.8  | 4233.4  | 991.2 | 984.4 | 1.4 | 1.0 | N.D. | N.D. | N.D.    | N.D.  |
| Vogel Canyon  | V2  | 388125.5 | 3796784.5 | 3405.0  | 3396.2  | 908.0 | 892.6 | 1.6 | 0.8 | 0.09 | 0.11 | 837.16  | 15.36 |
| Vogel Canyon  | V3  | 388100.5 | 3796791.5 | 3365.5  | 3360.7  | 888.6 | 881.2 | 1.6 | 0.8 | 0.13 | 0.32 | 35.56   | 7.34  |
| Vogel Canyon  | V4  | 387851.5 | 3796716.5 | 3010.4  | 3003.9  | 852.8 | 846.6 | 2.2 | 0.7 | 0.08 | 0.10 | 356.71  | 6.21  |
| Vogel Canyon  | V5  | 387846.5 | 3796705.5 | 2997.3  | 2979.6  | 845.1 | 810.3 | 2.2 | 0.7 | 0.22 | 1.49 | 24.31   | 34.78 |
| Vogel Canyon  | V6  | 387850.5 | 3796613.5 | 2867.4  | 2863.6  | 803.2 | 800.0 | 2.2 | 0.7 | 0.06 | 0.09 | 116.05  | 3.27  |
| Vogel Canyon  | V7  | 387865.5 | 3796610.5 | 2849.5  | 2845.7  | 798.7 | 796.1 | 2.2 | 0.7 | 0.09 | 0.22 | 17.90   | 2.59  |
| Vogel Canyon  | V8  | 387871.5 | 3796606.5 | 2841.9  | 2838.0  | 795.6 | 792.4 | 2.2 | 0.7 | 0.12 | 0.49 | 7.66    | 3.26  |
| Vogel Canyon  | V9  | 387761.5 | 3796502.5 | 2634.8  | 2620.7  | 774.1 | 745.2 | 2.3 | 0.6 | 0.09 | 0.22 | 217.28  | 28.86 |
| Vogel Canyon  | V10 | 387422.5 | 3795447.5 | 844.1   | 841.2   | 638.5 | 636.7 | 4.3 | 0.2 | 0.06 | 0.06 | 1779.51 | 1.81  |
| Vogel Canyon  | V11 | 387448.5 | 3795364.5 | 720.6   | 711.4   | 630.3 | 619.0 | 4.3 | 0.2 | 0.05 | 0.14 | 129.88  | 11.29 |
| Ybarra Canyon | Y1  | 387007.5 | 3797414.5 | 3886.8  | 3881.6  | 942.3 | 934.9 | 1.0 | 1.0 | N.D. | N.D. | N.D.    | N.D.  |
| Ybarra Canyon | Y2  | 387073.5 | 3797354.5 | 3784.6  | 3779.3  | 922.7 | 917.6 | 1.1 | 0.9 | 0.13 | 0.17 | 102.23  | 5.11  |
| Ybarra Canyon | Y3  | 387082.5 | 3797324.5 | 3750.0  | 3744.6  | 910.9 | 903.7 | 1.1 | 0.9 | 0.23 | 0.40 | 34.73   | 7.21  |
| Ybarra Canyon | Y4  | 387092.5 | 3797270.5 | 3687.4  | 3684.4  | 896.0 | 893.7 | 1.1 | 0.9 | 0.13 | 0.17 | 60.21   | 2.37  |
| Ybarra Canyon | Y5  | 387079.5 | 3797189.5 | 3585.8  | 3581.8  | 884.0 | 879.7 | 1.1 | 0.9 | 0.10 | 0.14 | 102.60  | 4.28  |
| Ybarra Canyon | Y6  | 387050.5 | 3797181.5 | 3553.5  | 3551.1  | 877.3 | 875.6 | 1.1 | 0.9 | 0.09 | 0.13 | 30.73   | 1.66  |
| Ybarra Canyon | Y7  | 387028.5 | 3797162.5 | 3522.5  | 3520.5  | 869.1 | 867.2 | 1.1 | 0.9 | 0.23 | 0.27 | 30.63   | 1.89  |
| Ybarra Canyon | Y8  | 386913.5 | 3797015.5 | 3302.9  | 3297.7  | 837.3 | 833.1 | 1.2 | 0.8 | 0.14 | 0.15 | 222.76  | 4.23  |
| Ybarra Canyon | Y9  | 386755.5 | 3796801.5 | 2993.9  | 2990.5  | 796.1 | 792.1 | 1.8 | 0.7 | 0.12 | 0.13 | 307.23  | 4.08  |
| Ybarra Canyon | Y10 | 386763.5 | 3796781.5 | 2969.4  | 2965.0  | 789.4 | 785.1 | 1.8 | 0.7 | 0.13 | 0.27 | 25.49   | 4.27  |
| Ybarra Canyon | Y11 | 386769.5 | 3796744.5 | 2925.7  | 2922.7  | 777.9 | 775.9 | 1.8 | 0.7 | 0.18 | 0.22 | 42.31   | 1.97  |
| Ybarra Canyon | Y12 | 386694.5 | 3796683.5 | 2812.0  | 2805.8  | 758.8 | 750.8 | 1.8 | 0.7 | 0.16 | 0.22 | 116.88  | 8.00  |
| Ybarra Canyon | Y13 | 386689.5 | 3796671.5 | 2797.9  | 2793.1  | 749.4 | 744.7 | 1.8 | 0.7 | 0.17 | 0.48 | 12.66   | 4.71  |
| Ybarra Canyon | Y14 | 386623.5 | 3796591.5 | 2661.8  | 2657.8  | 726.7 | 722.8 | 3.4 | 0.7 | 0.14 | 0.16 | 135.30  | 3.95  |
| Ybarra Canyon | Y15 | 386594.5 | 3796607.5 | 2620.8  | 2618.0  | 718.5 | 716.5 | 3.4 | 0.7 | 0.12 | 0.16 | 39.87   | 2.03  |
| Ybarra Canyon | Y16 | 386542.5 | 3796561.5 | 2524.5  | 2519.5  | 705.3 | 698.5 | 3.4 | 0.6 | 0.12 | 0.18 | 98.50   | 6.73  |
| Ybarra Canyon | Y17 | 386503.5 | 3796544.5 | 2466.2  | 2463.2  | 693.8 | 691.6 | 3.4 | 0.6 | 0.09 | 0.12 | 56.28   | 2.22  |
| Ybarra Canyon | Y18 | 386281.5 | 3796440.5 | 2084.2  | 2074.8  | 664.2 | 651.1 | 3.7 | 0.5 | 0.07 | 0.10 | 388.36  | 13.14 |
| Ybarra Canyon | Y19 | 387625.5 | 3797160.5 | 4236.2  | 4230.3  | 916.2 | 909.5 | 1.0 | 1.0 | N.D. | N.D. | N.D.    | N.D.  |
| Ybarra Canyon | Y20 | 387272.5 | 3796999.5 | 3729.4  | 3724.1  | 875.9 | 871.7 | 1.2 | 0.9 | 0.07 | 0.07 | 506.22  | 4.20  |
| Ybarra Canyon | Y21 | 387049.5 | 3796891.5 | 3381.4  | 3378.9  | 838.3 | 836.0 | 1.5 | 0.8 | 0.10 | 0.10 | 345.19  | 2.28  |
| Ybarra Canyon | Y22 | 387023.5 | 3796888.5 | 3351.6  | 3345.4  | 832.5 | 823.5 | 1.5 | 0.8 | 0.13 | 0.37 | 33.56   | 9.01  |
| Ybarra Canyon | Y23 | 387000.5 | 3796867.5 | 3316.4  | 3312.4  | 820.5 | 817.1 | 1.5 | 0.8 | 0.10 | 0.19 | 32.97   | 3.40  |
| Ybarra Canyon | Y24 | 386948.5 | 3796817.5 | 3235.8  | 3232.4  | 811.7 | 808.2 | 1.5 | 0.8 | 0.07 | 0.11 | 79.98   | 3.46  |
| Ybarra Canyon | Y25 | 386946.5 | 3796812.5 | 3230.0  | 3227.0  | 806.8 | 804.2 | 1.5 | 0.8 | 0.57 | 0.73 | 5.41    | 2.60  |
| Ybarra Canyon | Y26 | 386857.5 | 3796677.5 | 3014.8  | 3012.4  | 788.4 | 786.6 | 1.5 | 0.7 | 0.07 | 0.08 | 214.59  | 1.78  |
| Ybarra Canyon | Y27 | 386856.5 | 3796649.5 | 2983.1  | 2980.3  | 783.6 | 781.9 | 1.5 | 0.7 | 0.10 | 0.15 | 32.14   | 1.68  |
| Ybarra Canyon | Y28 | 386713.5 | 3796586.5 | 2791.6  | 2789.2  | 764.0 | 761.8 | 1.5 | 0.7 | 0.09 | 0.11 | 191.07  | 2.19  |
| Ybarra Canyon | Y29 | 386665.5 | 3796581.5 | 2725.28 | 2707.03 | 754.7 | 732.0 | 1.5 | 0.6 | 0.11 | 0.36 | 82.18   | 22.76 |

Note: N.D. stands for No Data

\* $X_L$  is the horizontal distance of the waterfall lip from the outlet.

\*\* $X_B$  is the horizontal distance of the waterfall base from the outlet.

# $Z_L$  is the elevation of the waterfall lip.

## $Z_B$  is the elevation of the waterfall base.

### Non-dimensional distance of waterfalls calculated as the distance from the outlet divided by the total length of stream.

\* $S_R$  is the slope of the river excluding relief from waterfalls measured for the reach above each waterfall unit.

\*\*\* $S_U$  is the waterfall unit slope measured from the base of the upstream waterfall to the base of the downstream waterfall.

\* $L_U$  is the waterfall unit length measured as the horizontal distance from the base of the upstream waterfall to the base of the downstream waterfall.

\*\* $H_{wf}$  is the height of the waterfall step measured from lip to base.
